# Supplementary material for: Palladium(ii) complexes bearing 1-iminothiolate-3,5-dimethylpyrazoles: synthesis, cytotoxicity, DNA binding and enzymatic inhibition studies
Source: Royal Society of Chemistry journal article supplement (doi:10.1039/d0nj02825h), 2020-01-01
Supplement: d0nj02825h1.pdf [file d0nj02825h1.pdf]

## Electronic Supplementary Information – New Journal of Chemistry

### **Palladium(II) complexes bearing 1-iminothiolate-3,5-dimethylpyrazoles: synthesis, cytotoxicity, DNA binding and enzymatic inhibition studies**

Thales Reggiani de Moura,<sup>\*a</sup> Renan Diego Zanetti,<sup>a</sup> Debora Eduarda Soares Silva,<sup>a</sup> Renan Lira Farias,<sup>a</sup> Antonio Eduardo Mauro,<sup>a</sup> José Clayston Melo Pereira,<sup>a</sup> Aline Aparecida de Souza,<sup>b</sup> Fábio da Silva Siqueira,<sup>b</sup> Wagner Alves de Souza Júdice,<sup>b</sup> Mauro Almeida Lima,<sup>c</sup> Fillipe Vieira Rocha,<sup>c</sup> Victor Marcelo Deflon<sup>d</sup> and Adelino Vieira de Godoy Netto<sup>a</sup>

<sup>a</sup>. UNESP – Univ Estadual Paulista, Instituto de Química, Departamento de Química Geral e Inorgânica, 14800-060, Araraquara, SP, Brazil

<sup>b</sup>. UMC – Univ de Mogi das Cruzes, Centro Interdisciplinar de Investigação Bioquímica, 08701-970, Mogi das Cruzes, SP, Brazil.

<sup>c</sup>. UFSCar – Univ Federal de São Carlos, Departamento de Química, 13565-905, São Carlos, SP, Brazil

<sup>d</sup>. USP – Univ de São Paulo, Instituto de Química de São Carlos, 13560-970, São Carlos, SP, Brazil

\*Corresponding author: e-mail address. [thalesreggiani@gmail.com](mailto:thalesreggiani@gmail.com)

tel. +55 17 98122-8137

---

## S1. Experimental Methods:

### S1.1. X-ray crystallography

The crystal structure (Fig. 1) was elucidated by X-ray single crystal diffraction at room temperature (CCDC number: 2006687). Data collections for single crystal structure determination of **3** were performed on a BRUKER KAPPA APEX II DUO diffractometer using graphite-monochromated MoK $\alpha$  radiation ( $\lambda = 0.71073$  Å) at 23°C. The multi-scan absorption correction method was employed. SHELXS and SHELXL software were used for structure solution and refinement.<sup>1</sup> The hydrogen atoms positions were refined with fixed individual isotropic displacement parameters using a riding model. All non-hydrogen atoms positions were refined with anisotropic thermal displacements. A summary of the crystal data, experimental details and refinement results is given in Table 1S.

**Table 1S.1** Crystal and structure refinement data for cis-[PdCl(N,S-L<sub>3</sub>)(PPh<sub>3</sub>)] (**3**)

|                                              |                                                               |
|----------------------------------------------|---------------------------------------------------------------|
| Formula                                      | C <sub>26</sub> H <sub>27</sub> ClN <sub>3</sub> PPdS         |
| Formula weight                               | 586.38                                                        |
| Wavelength                                   | 0.71073 Å                                                     |
| Crystal system                               | Orthorhombic                                                  |
| Space group                                  | P b c a                                                       |
| Temperature /K                               | 296(2) K                                                      |
| <i>a</i> / Å                                 | 9.1066(3) Å $\alpha = 90^\circ$                               |
| <i>b</i> / Å                                 | 14.6728(5) Å $\beta = 90^\circ$                               |
| <i>c</i> / Å                                 | 38.6322(14) Å $\gamma = 90^\circ$                             |
| <i>V</i> / Å <sup>3</sup>                    | 5162.0(3) Å <sup>3</sup>                                      |
| <i>Z</i>                                     | 8                                                             |
| <i>D</i> <sub>calc</sub>                     | 1.509 Mg/m <sup>3</sup>                                       |
| Absorption coefficient                       | 0.985 mm <sup>-1</sup>                                        |
| F(000)                                       | 2384                                                          |
| Crystal size                                 | 0.880 x 0.380 x 0.200 mm <sup>3</sup>                         |
| $\theta$ range for data collection (°)       | 2.109 to 26.395°.                                             |
| Index ranges                                 | -11 ≤ <i>h</i> ≤ 11, -18 ≤ <i>k</i> ≤ 18, -48 ≤ <i>l</i> ≤ 48 |
| Reflections collected                        | 77198                                                         |
| Independent reflections                      | 5292 [R(int) = 0.0287]                                        |
| Completeness to theta = 25.242°              | 100.0 %                                                       |
| Absorption correction                        | Semi-empirical from equivalents                               |
| Max. and min. transmission                   | 0.7454 and 0.5288                                             |
| Refinement method                            | Full-matrix least-squares on F <sup>2</sup>                   |
| Data / restraints / parameters               | 5292 / 0 / 301                                                |
| Goodness-of-fit on F <sup>2</sup>            | 1.375                                                         |
| Final R indices [ <i>I</i> > 2σ( <i>I</i> )] | R1 = 0.0424, wR2 = 0.1079                                     |
| R indices (all data)                         | R1 = 0.0442, wR2 = 0.1090                                     |
| Largest diff. peak and hole                  | 0.535 and -1.789 e.Å <sup>-3</sup>                            |

### S1.2. DNA interaction studies

A standard solution of calf thymus DNA (CT-DNA) was prepared in Tris–HCl buffer (5 mM Tris–HCl and 50 mM NaCl, pH 7.3). The purity of the DNA solution was verified by the ratio between 260 and 280 nm absorption bands with values in the range of 1.8–1.9 that are consistent with a solution free of proteins. The DNA concentration was determined spectrophotometrically using the molar absorption coefficient of 6600 L mol<sup>-1</sup> cm<sup>-1</sup> at 260 nm.<sup>2</sup>

### S1.3. Spectroscopic titration

The titration experiments were performed in a quartz cell with Tris–HCl buffer with 2% DMSO and concentration of the complex fixed in 20 μM. The UV–vis spectra were obtained with increasing amounts of CT-DNA with concentration ranging from 0 to 60 μM, that was added both in the compound solution and the reference. The binding constant (*K<sub>b</sub>*) was obtained by the Wolfe-Shimer relationship.<sup>3,4</sup>

$$\text{Wolfe-Shimer Equation: } \frac{[DNA]}{(\epsilon_a - \epsilon_f)} = \frac{[DNA]}{(\epsilon_b - \epsilon_f)} + \frac{1}{K_b(\epsilon_b - \epsilon_f)} *$$

\* [DNA] is the concentration of CT-DNA, the molar absorptivity coefficients  $\epsilon_a$ ,  $\epsilon_f$  and  $\epsilon_b$  correspond to Aobs/[complex], the free compounds and the compounds in the fully bound form, respectively. *K<sub>b</sub>* is the binding constant in M<sup>-1</sup>. The value of the constant was calculated by the ratio between the slope and the linear coefficient in a plot of [DNA]/ $\epsilon_a - \epsilon_f$  versus [DNA].

Complex 2:

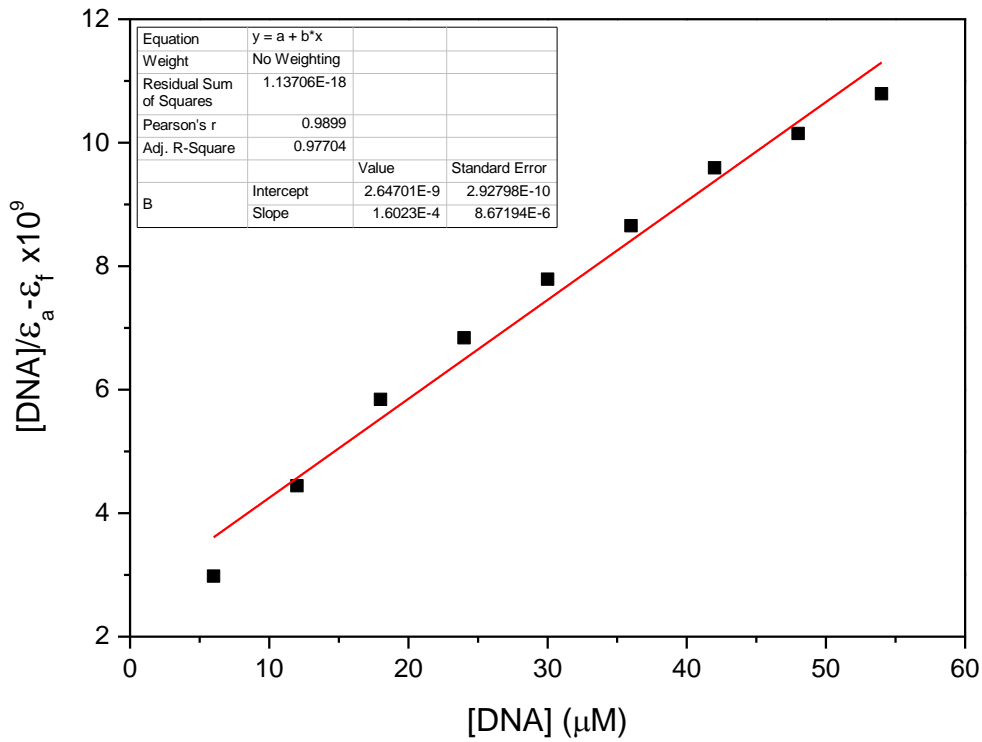

Complex 3:

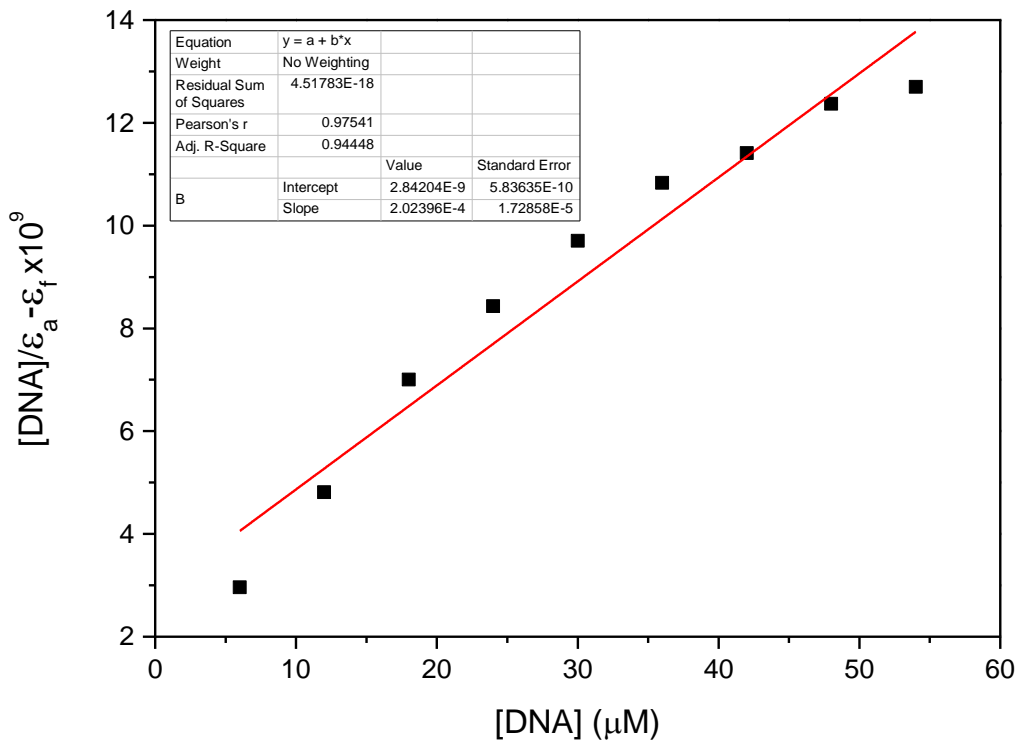

#### S1.4. Circular dichroism (CD)

The CD spectra were obtained ranging from 235 to 300 nm using a standard quartz cell of 10 mm path length. The spectra were recorded with accumulation of 5 scans in a continuous scanning mode (100 nm/min). The concentration of the DNA solution in Tris-HCl buffer was kept constant in all samples (50  $\mu\text{M}$ ). The complex solution was freshly prepared in DMSO (1 mM) and then additions were made to DNA solution to achieve molar ratio of complex/DNA from 0 to 0.3, maintaining DMSO percentage lower than 2%. The samples of pure DNA and DNA-Complex were incubated at 37  $^{\circ}\text{C}$  for 24 h before the CD spectra were collected.<sup>5</sup>

#### S1.5. Hoechst 33258 Displacement Experiments

The competitive displacement Hoechst 33258 assay was ranging from 358 to 660 nm, with excitation wavelength of 340 nm and 5.0 nm bandwidth. The DNA and Hoechst 33258 concentrations were kept fixed in 60  $\mu\text{M}$  and 6  $\mu\text{M}$ , respectively. The complex solution freshly prepared in DMSO (2 mM) was added to DNA-Hoechst 33258 solution in order to achieve concentrations from 0 to 54  $\mu\text{M}$  (molar ratios from 0 to 0.9 complex/DNA). The percentage of DMSO in the experiment was maintained lower than 3%. All the spectra were recorded after an interval of 5 min between each addition. To evaluate the affinity of the compounds by the DNA, the Stern-Volmer relationship was applied and the value of the quenching constant ( $K_{\text{SV}}$ ) calculated.<sup>6</sup>

**Stern-Volmer Equation:**  $F_0/F = 1 + K_{\text{SV}}[Q]^*$

\*  $F_0$  and  $F$  are fluorescence intensity of Hoechst-DNA adduct before and after the compound addition, respectively. The  $K_{\text{SV}}$  is the quenching constant of Stern-Volmer and  $[Q]$  is the compound concentration. The value of the constant was obtained by the slope of the linear plot of  $F_0/F$  versus  $[Q]$ .

#### Complex 2:

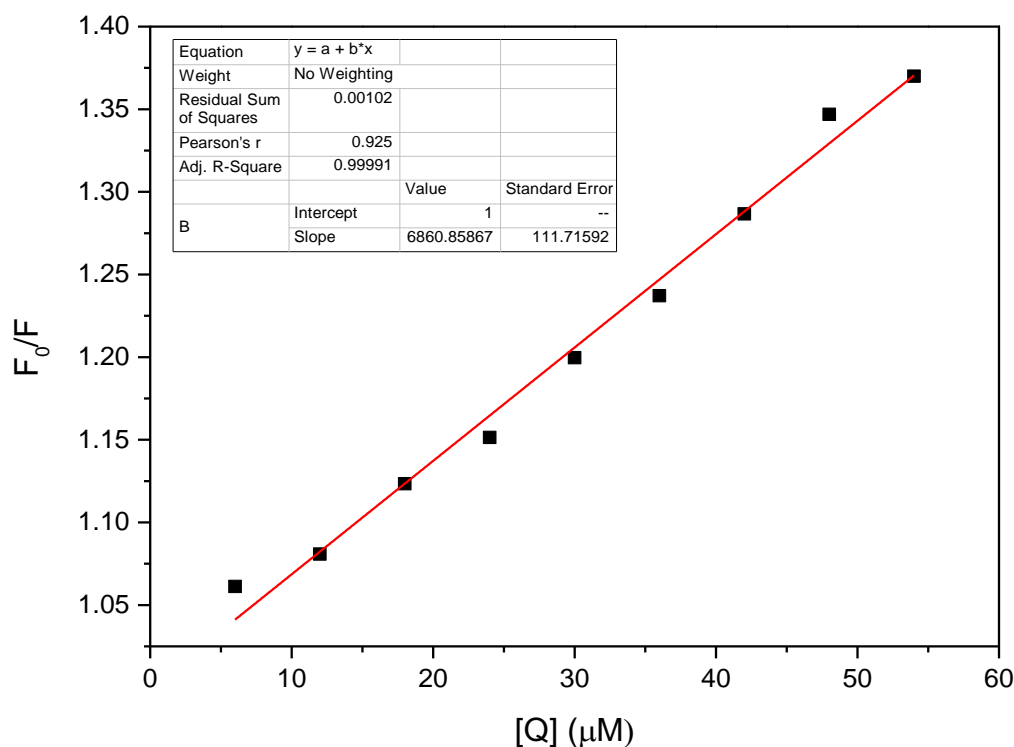

**Complex 3:**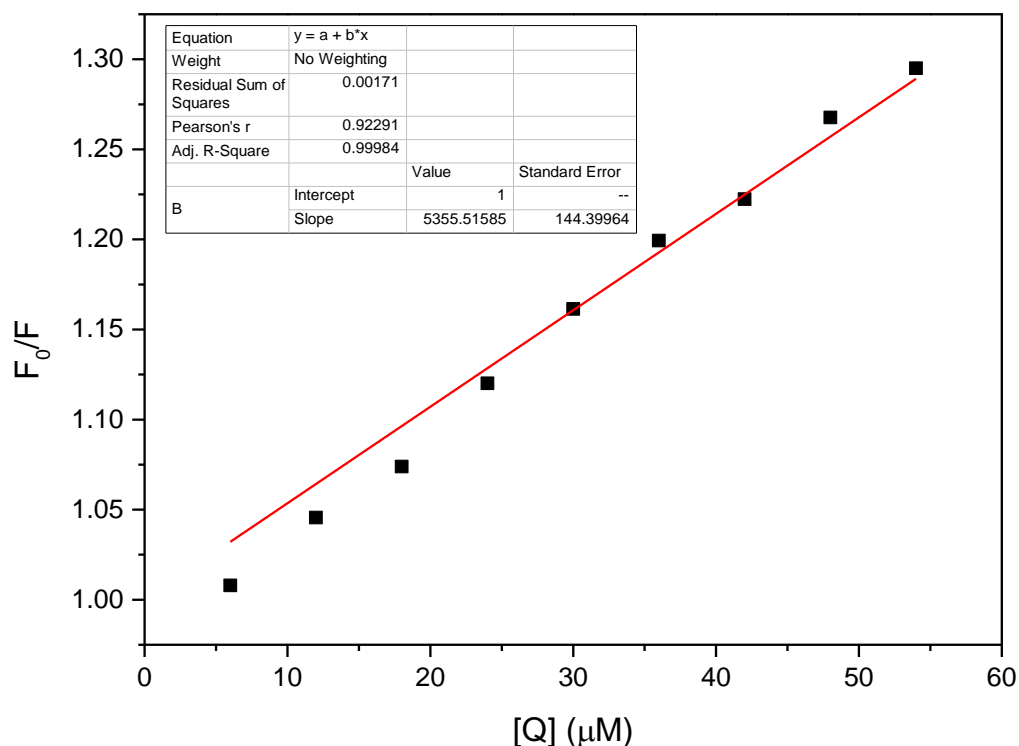**S1.6. Topoisomerase II $\alpha$  Interaction: Relaxation Assay**

The Human Topoisomerase II relaxation kit was purchased from Inspiralis Limited, Norwich, United Kingdom. The reaction mixture (30  $\mu\text{L}$ ) contained 10 mmol  $\text{L}^{-1}$  TrisHCl (pH 7.9), 50 mmol  $\text{L}^{-1}$  NaCl, 50 mmol  $\text{L}^{-1}$  KCl, 5.0, mmol  $\text{L}^{-1}$   $\text{MgCl}_2$ , 0.1 mmol  $\text{L}^{-1}$   $\text{Na}_2\text{H}_2\text{EDTA}$ , 15 mg  $\text{mL}^{-1}$  BSA, 1.0 mmol  $\text{L}^{-1}$  ATP, 500 ng pBR322 DNA, and 4.0 nmol  $\text{L}^{-1}$  Topo II $\alpha$ , with two different concentrations of the complexes. The reaction mixtures were incubated at 37  $^\circ\text{C}$  for 1 h. The reaction was terminated by the addition of 3  $\mu\text{L}$  SDS, 15  $\mu\text{L}$  of STEB and 60  $\mu\text{L}$  of chloroform: the isoamyl alcohol (24:1 v/v) mixture was centrifuged and analyzed. The samples were electrophoresed at 30 V for 12 h. The gel was then stained with ethidium bromide solution (1 mg  $\text{mL}^{-1}$ ) and analyzed by the Gel Doc<sup>TM</sup> EZ Gel.

## S1.7. Docking studies and modelling calculation

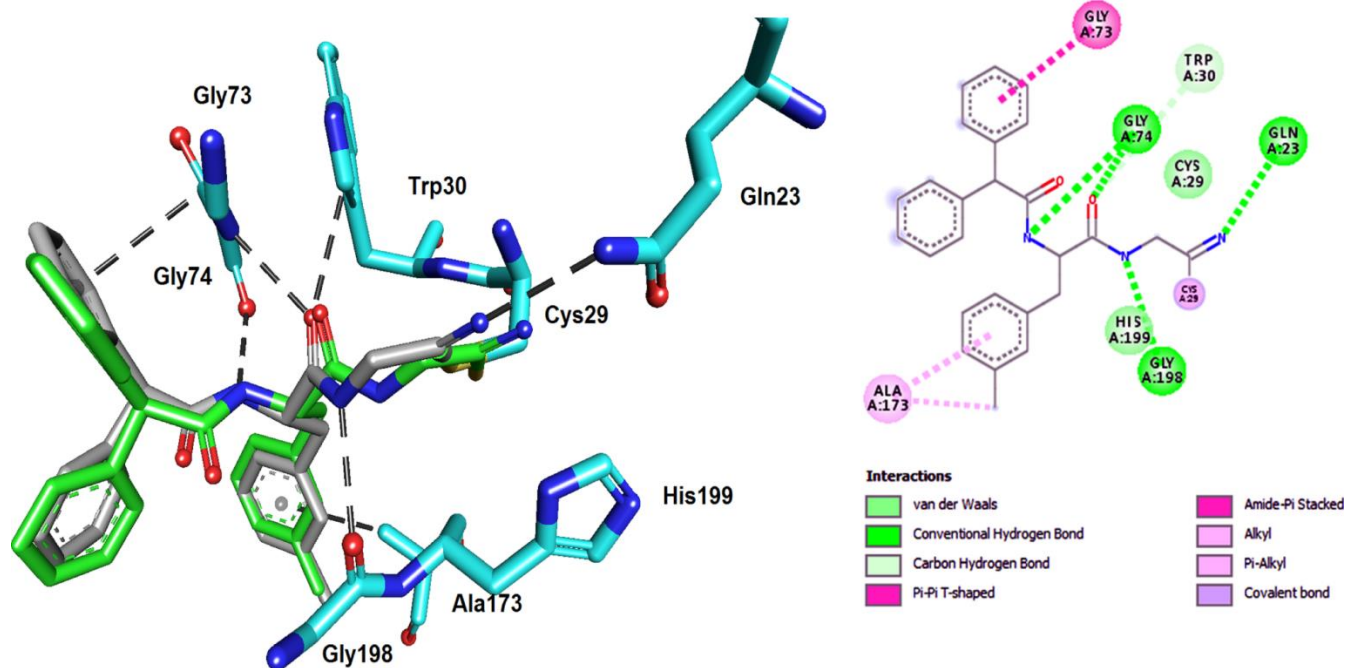

**Fig. S1.** Left: Redocked dipeptidyl inhibitor (carbons in green) with smallest RMSD 1.673Å superimposed on original crystal structure from 1GMV.pdb. Right: 2-D diagram of key residues and intermolecular contacts in the S-site pocket

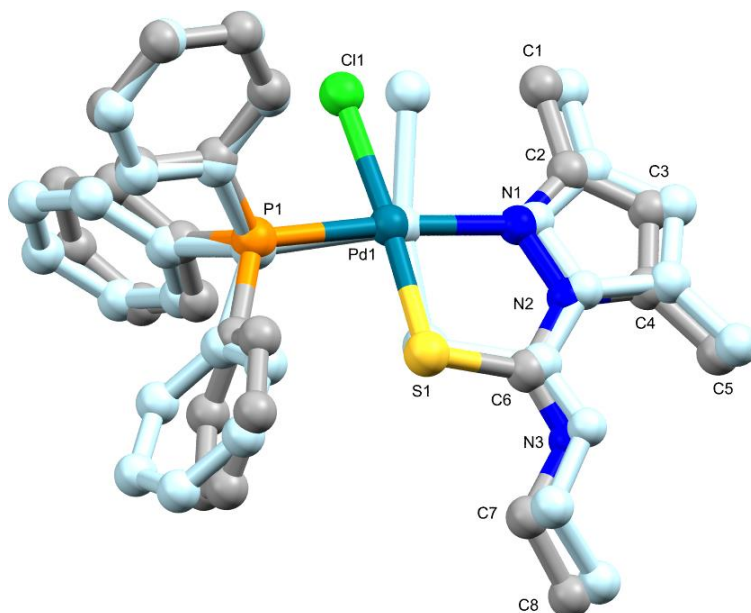

**Fig. S2.** Heavy atom overlay between the crystallographic and theoretical structures of **3**. The RMSD value amounts to 0.4884 Å. The theoretical result is shown as light blue ball-and-stick representation.

**S2. Characterization of ligands and complexes****S2.1. NMR Spectra**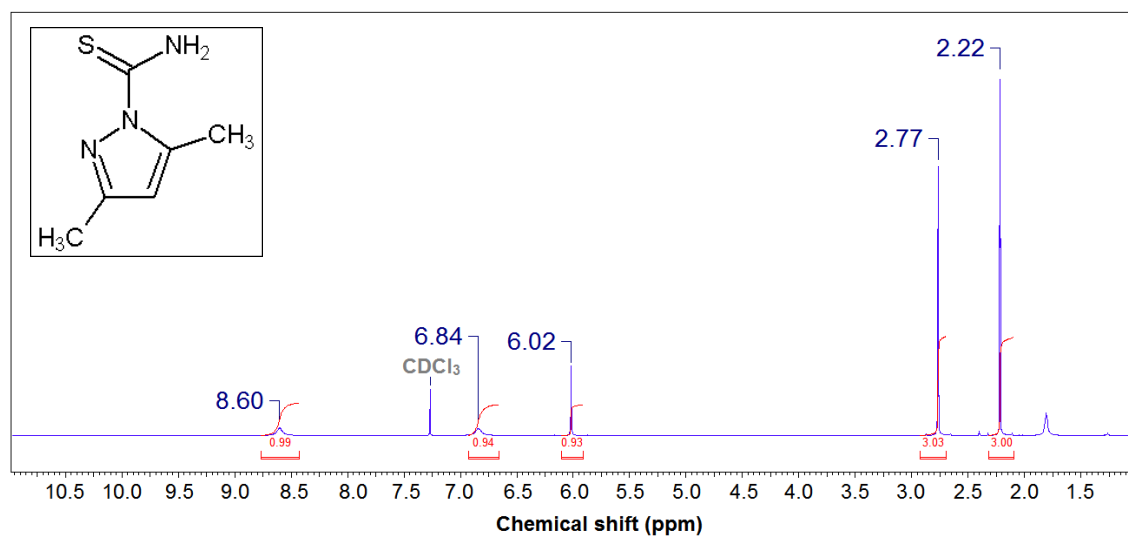**Fig. S3**  $^1\text{H}$  NMR spectrum of  $\text{HL}_1$ 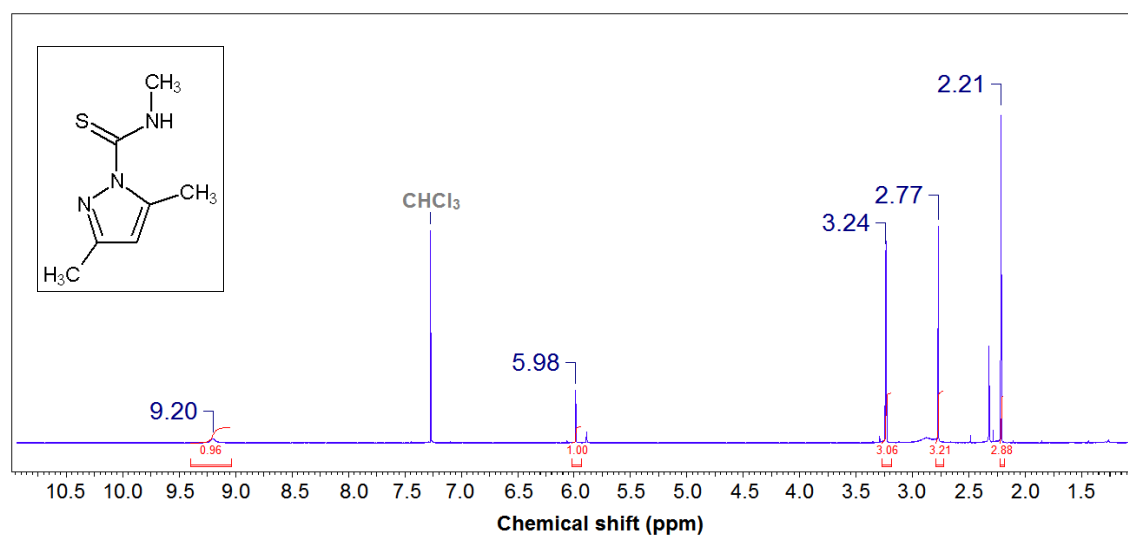**Fig. S4.**  $^1\text{H}$  NMR spectrum of  $\text{HL}_2$

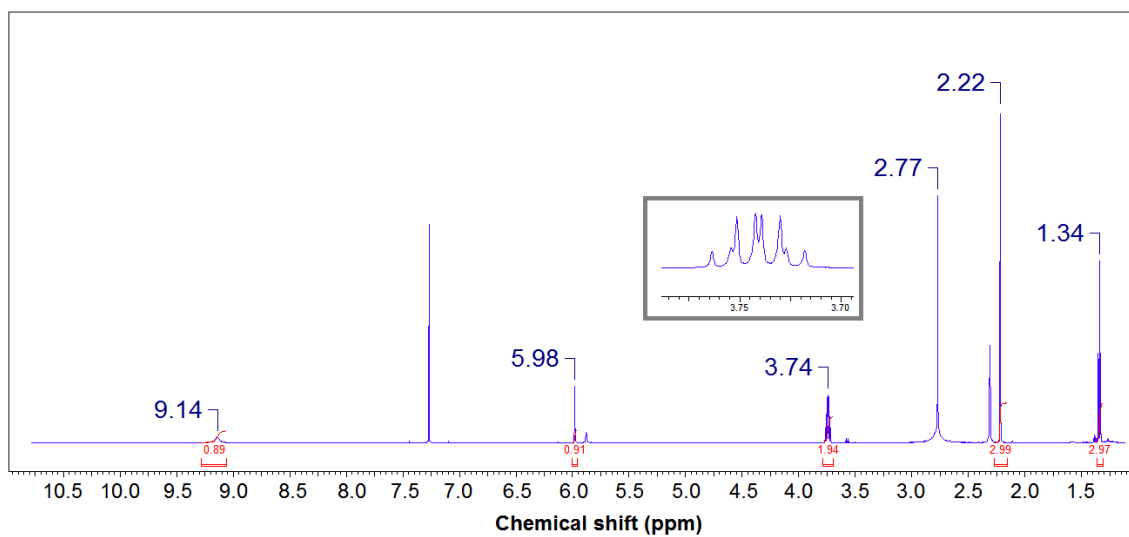Fig. S5. <sup>1</sup>H NMR spectrum of **HL<sub>3</sub>**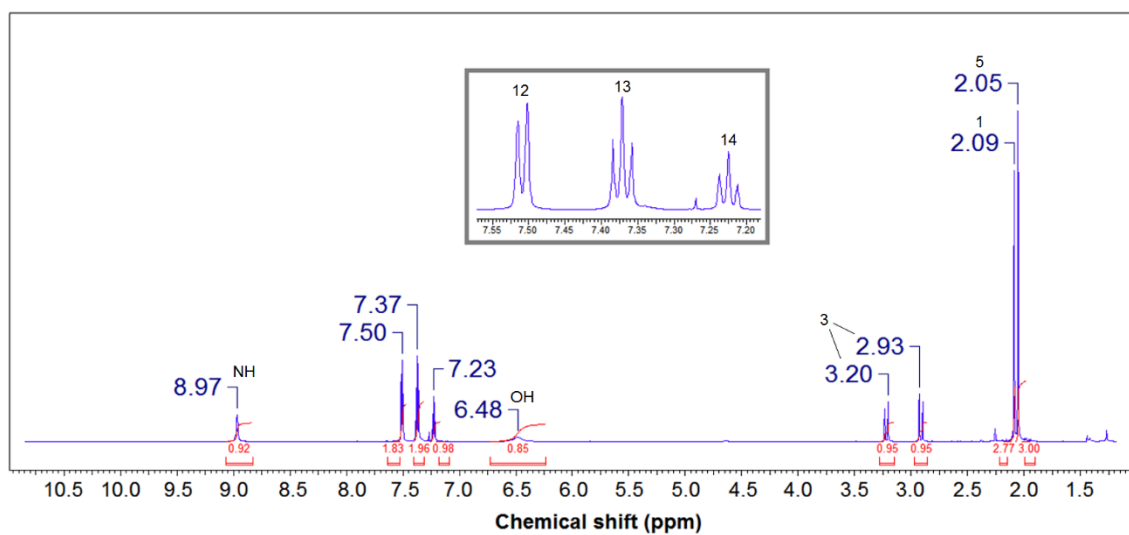Fig. S6. <sup>1</sup>H NMR spectrum of **HL<sub>4</sub>'**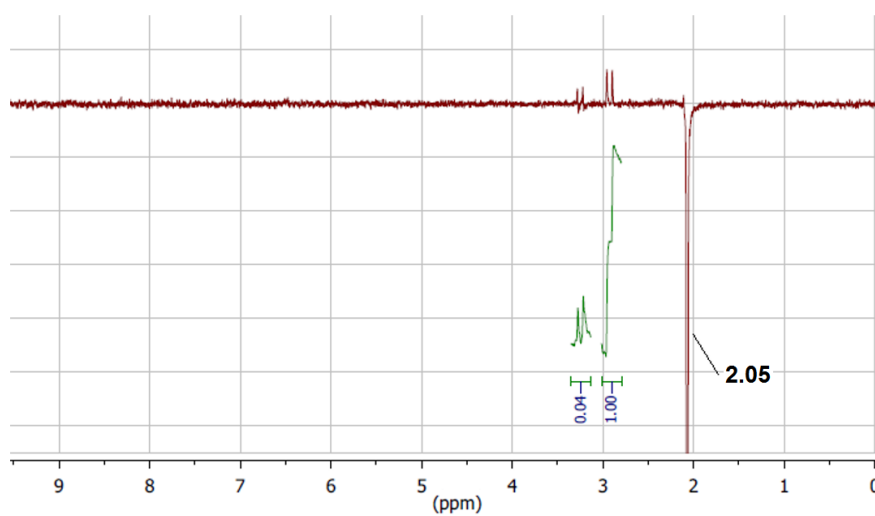Fig. S7. 1D NOESY (2.05 ppm) NMR spectrum of **HL<sub>4</sub>'**



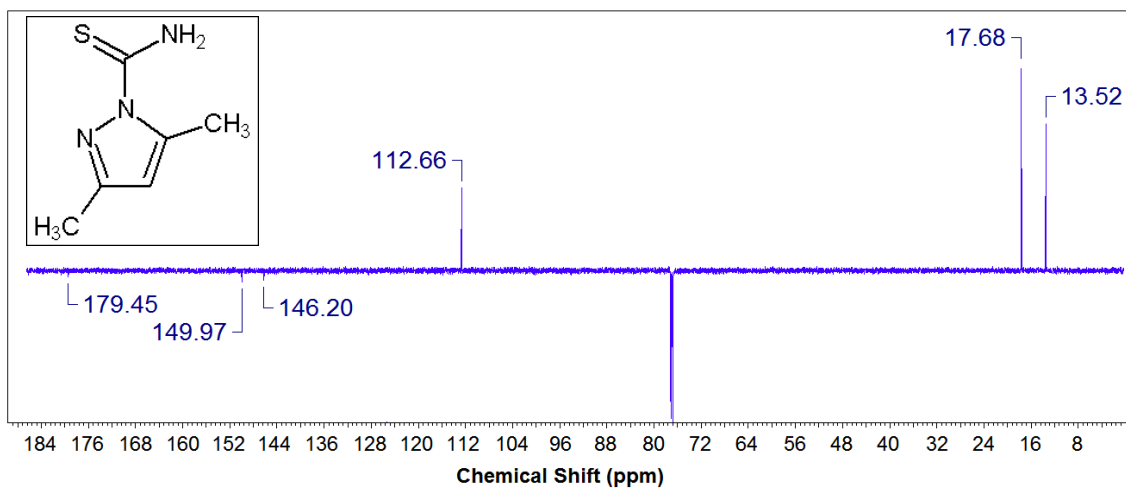Fig. S8. DEPTQ NMR spectrum of **HL<sub>1</sub>**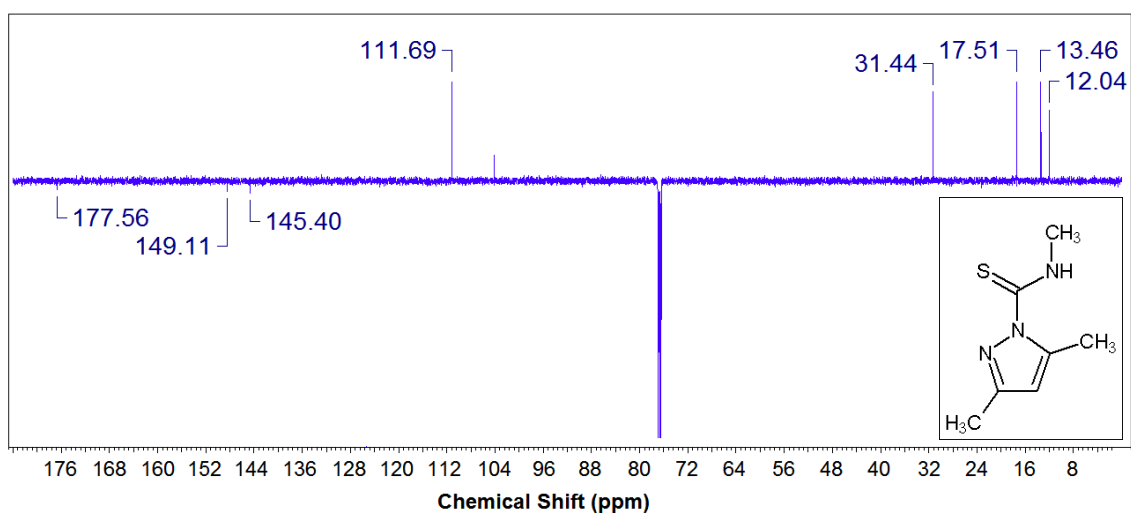Fig. S9. DEPTQ NMR spectrum of **HL<sub>2</sub>**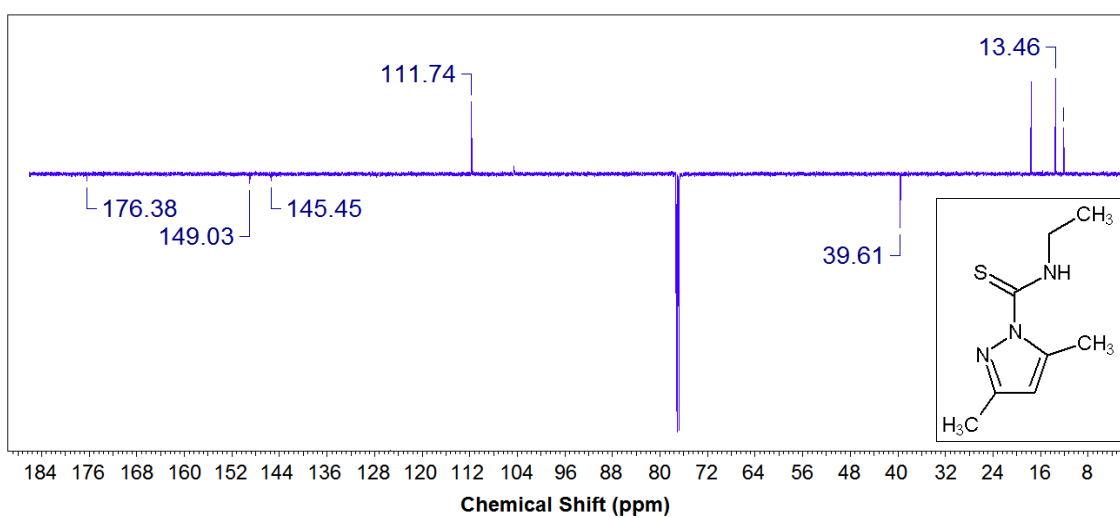Fig. S10. DEPTQ NMR spectrum of **HL<sub>3</sub>**

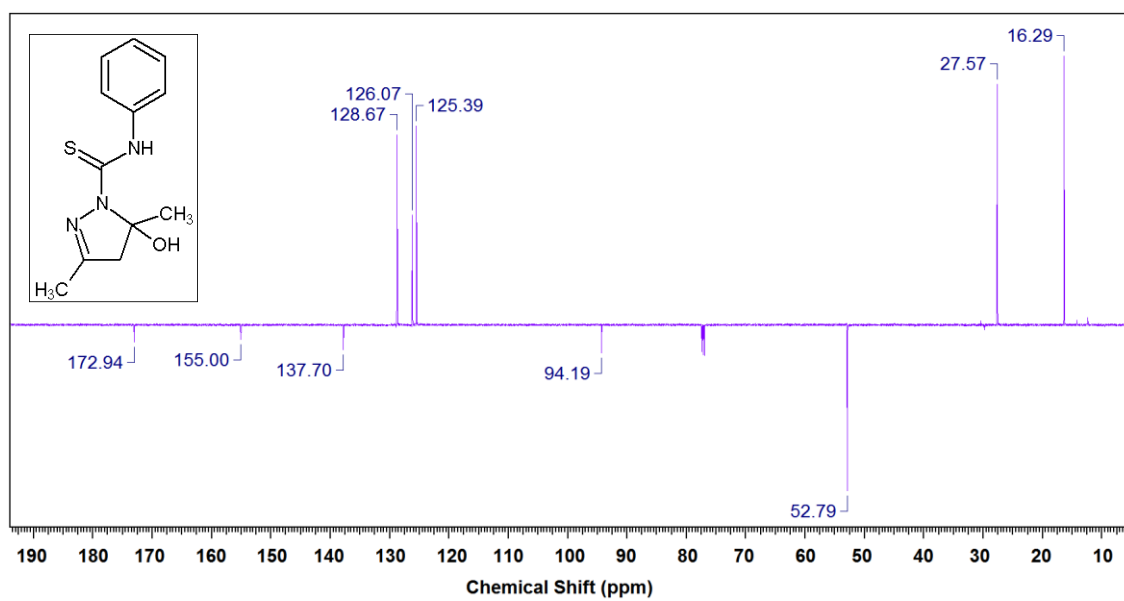

Fig. S11. DEPTQ NMR spectrum of **HL<sub>4</sub>'**

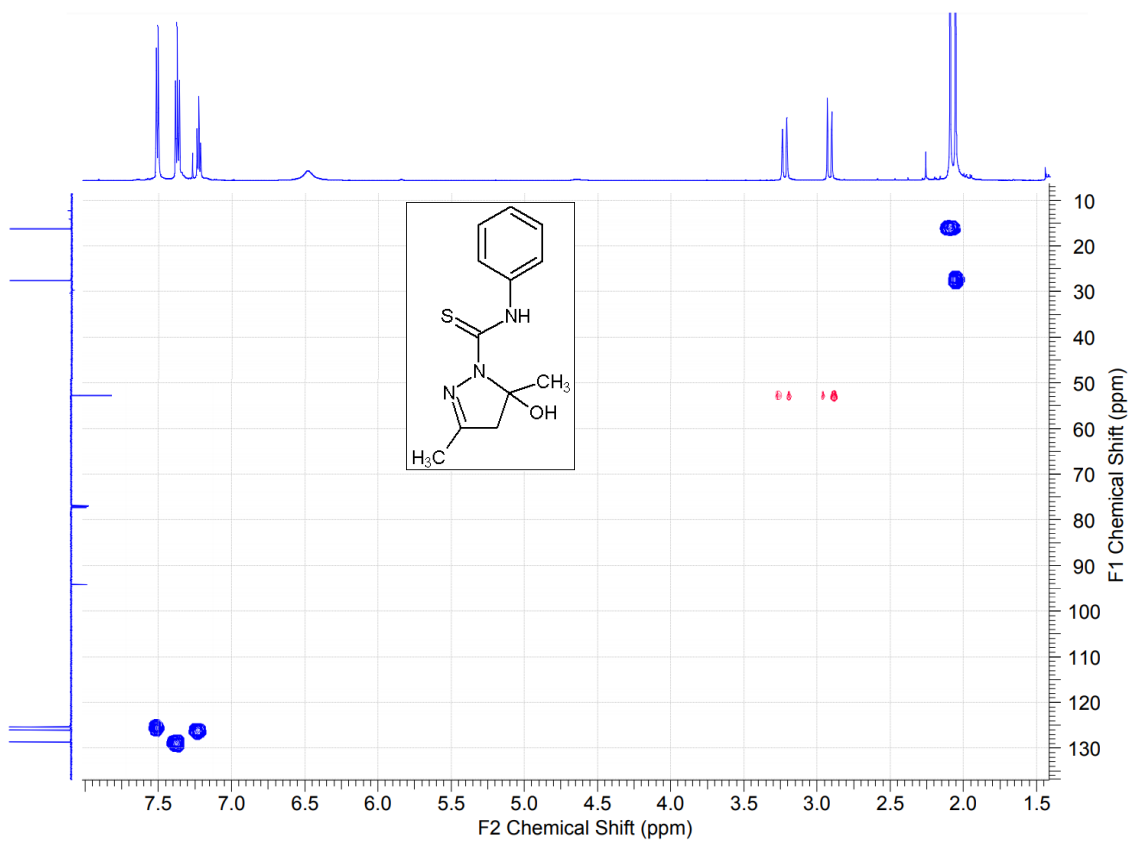

Fig. S12.  $^1\text{H}$ - $^{13}\text{C}$  HSQC NMR spectrum of  $\text{HL}_4'$

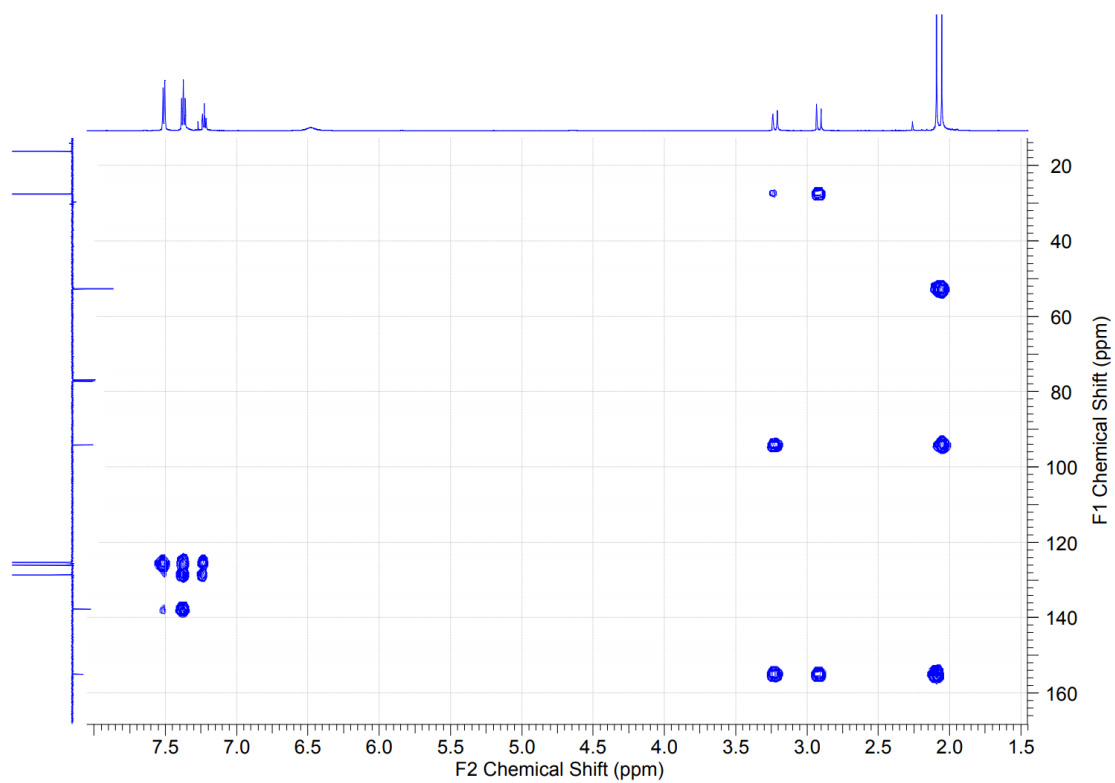

Fig. S13.  $^1\text{H}$ - $^{13}\text{C}$  HMBC NMR spectrum of  $\text{HL}_4'$

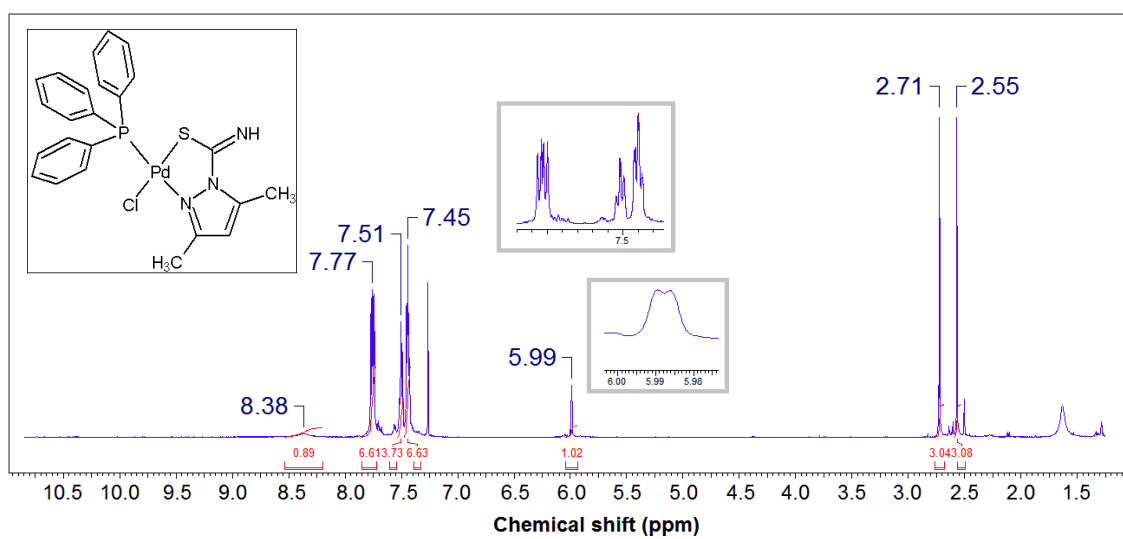

Fig. S14.  $^1\text{H}$  NMR spectrum of complex 1

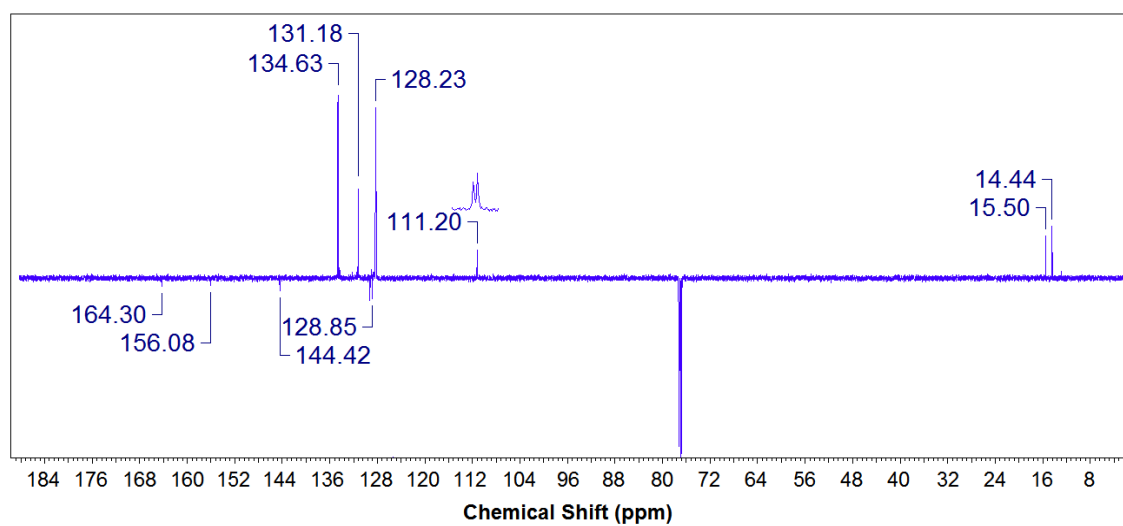

Fig. S15. DEPTQ NMR spectrum of complex 1

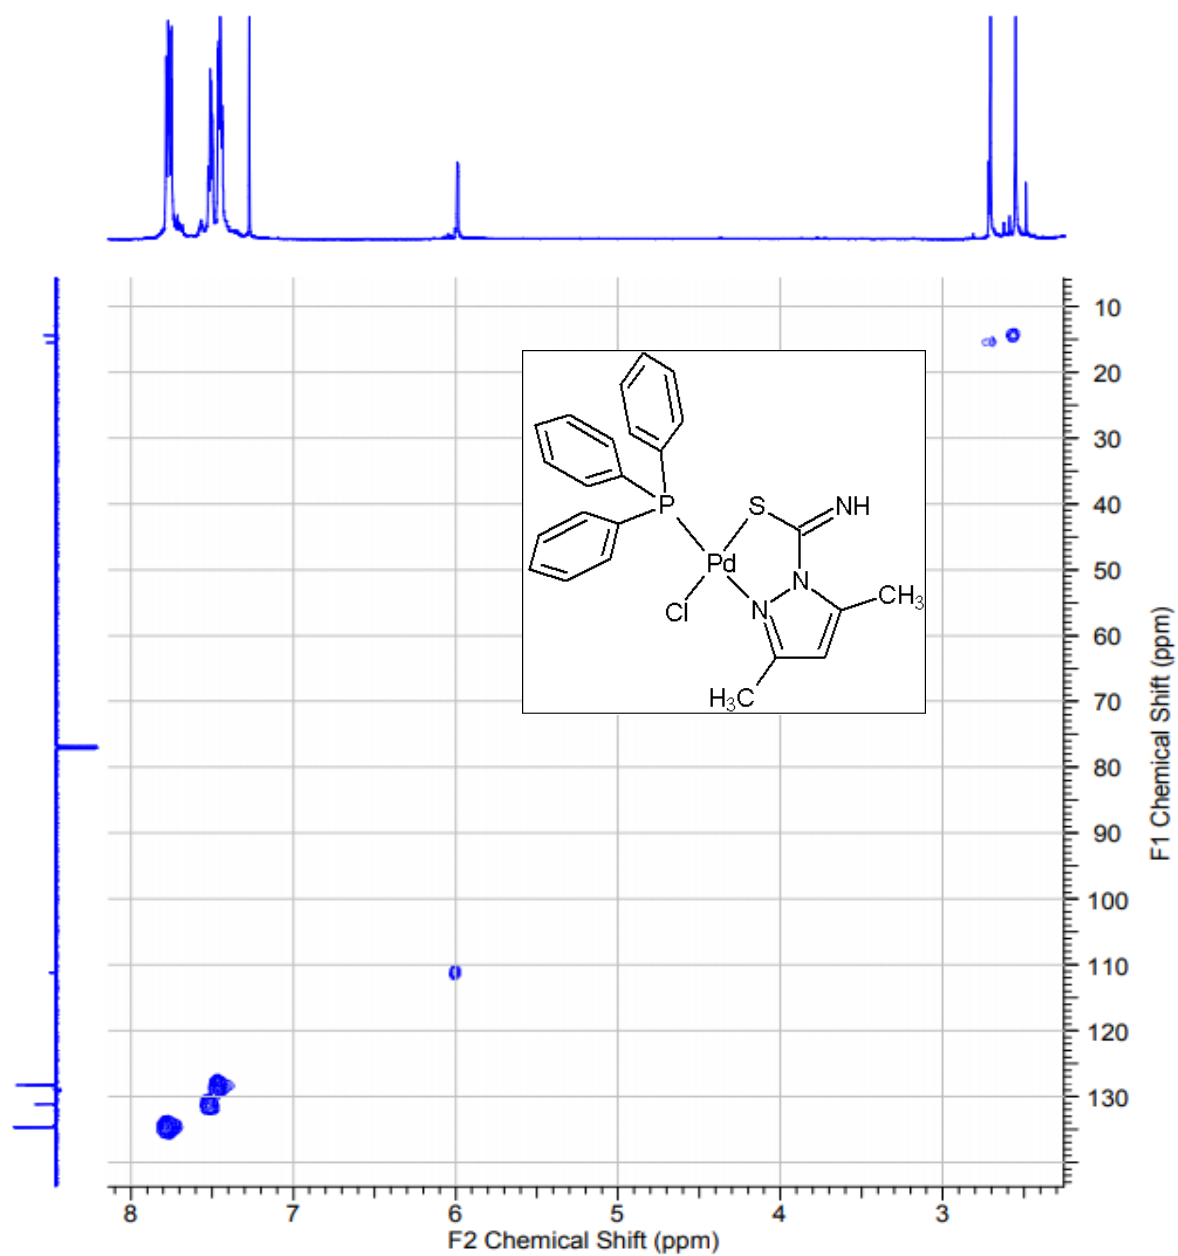

Fig. S16.  $^1\text{H}$ - $^{13}\text{C}$  HSQC NMR spectrum of complex 1

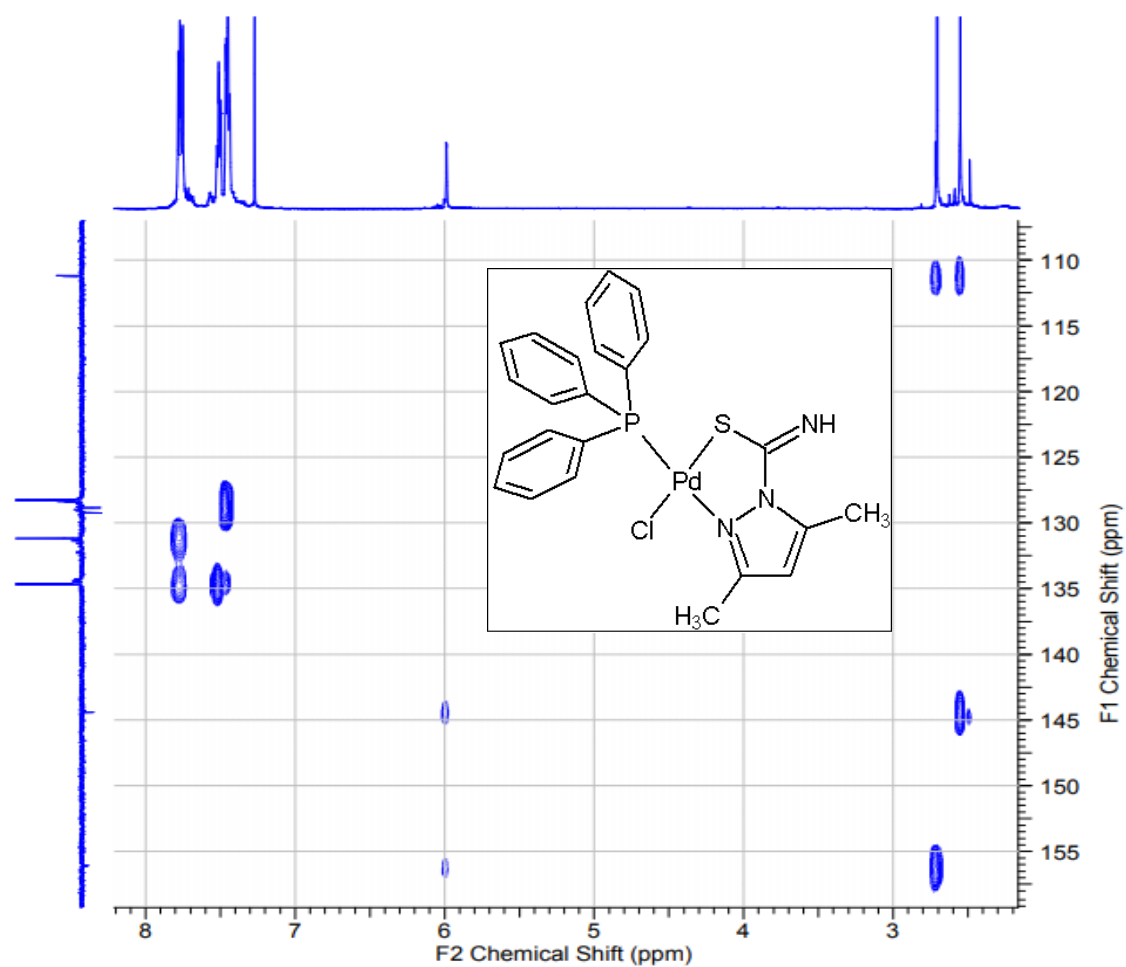

Fig. S17.  $^1\text{H}$ - $^{13}\text{C}$  HMBC NMR spectrum of complex 1

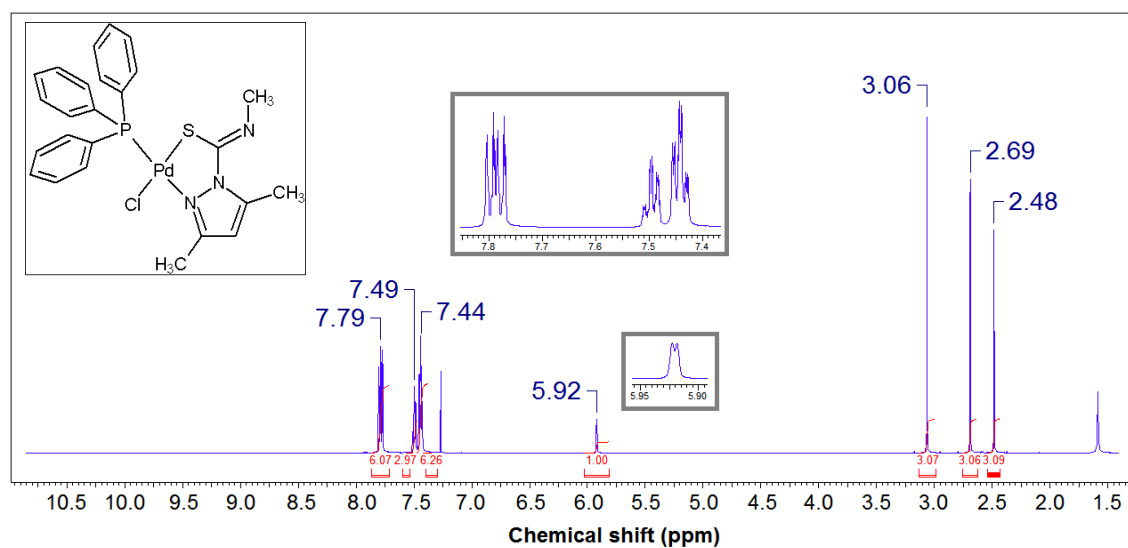

Fig. S18.  $^1\text{H}$  NMR spectrum of complex 2

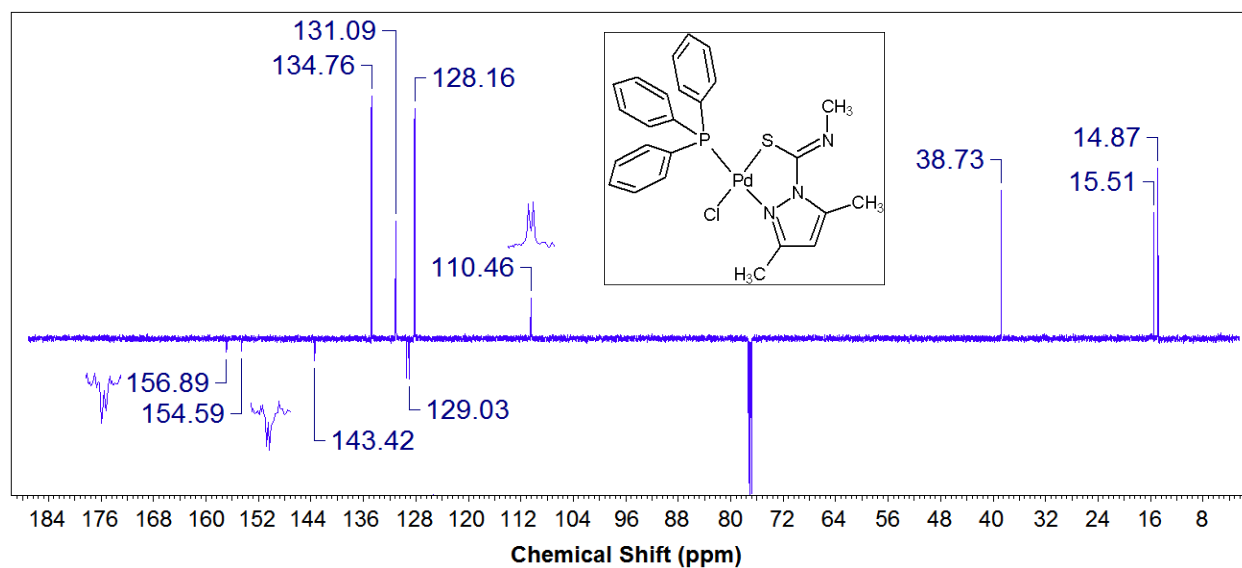

Fig. S19. DEPTQ NMR spectrum of complex 2

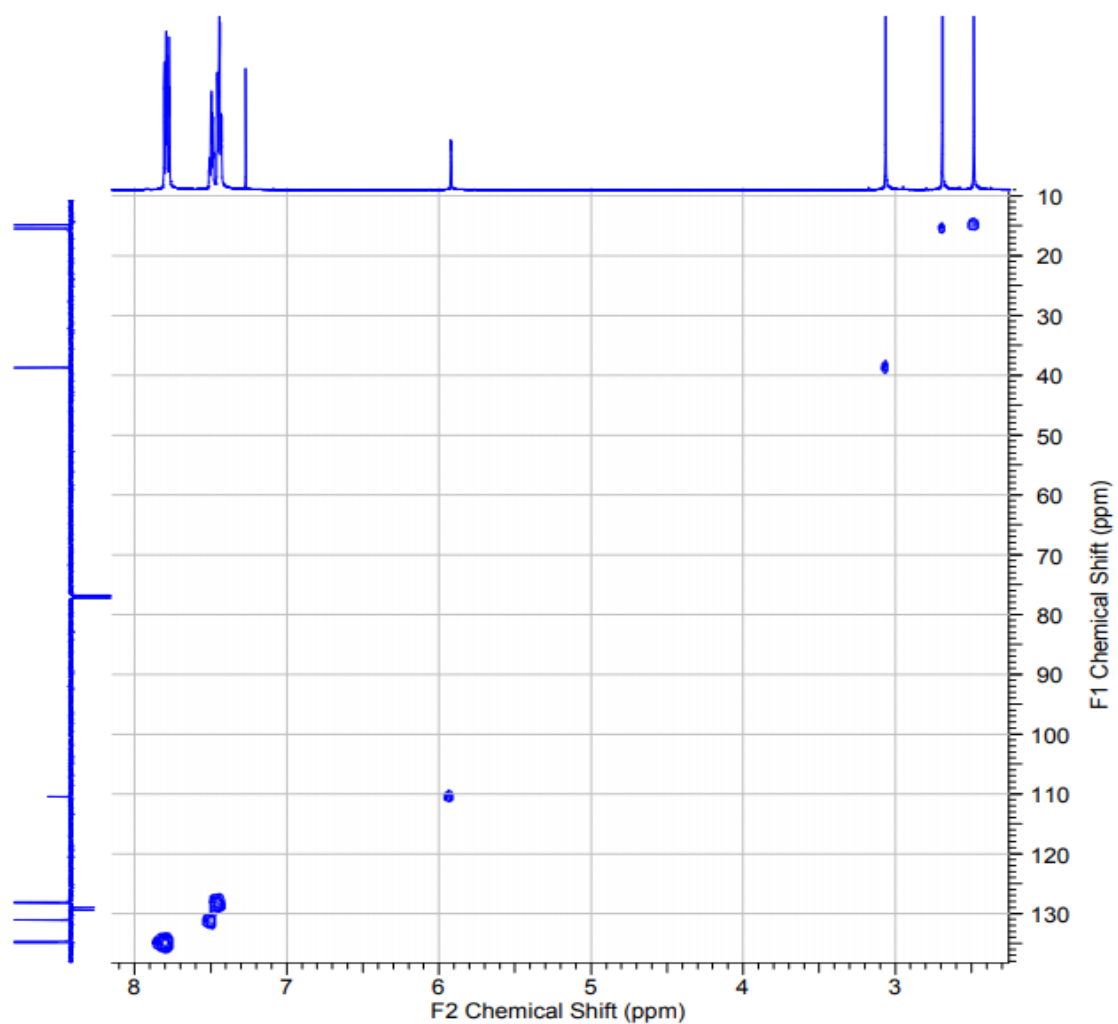Fig. S20.  $^1\text{H}$ - $^{13}\text{C}$  HSQC NMR spectrum of complex 2

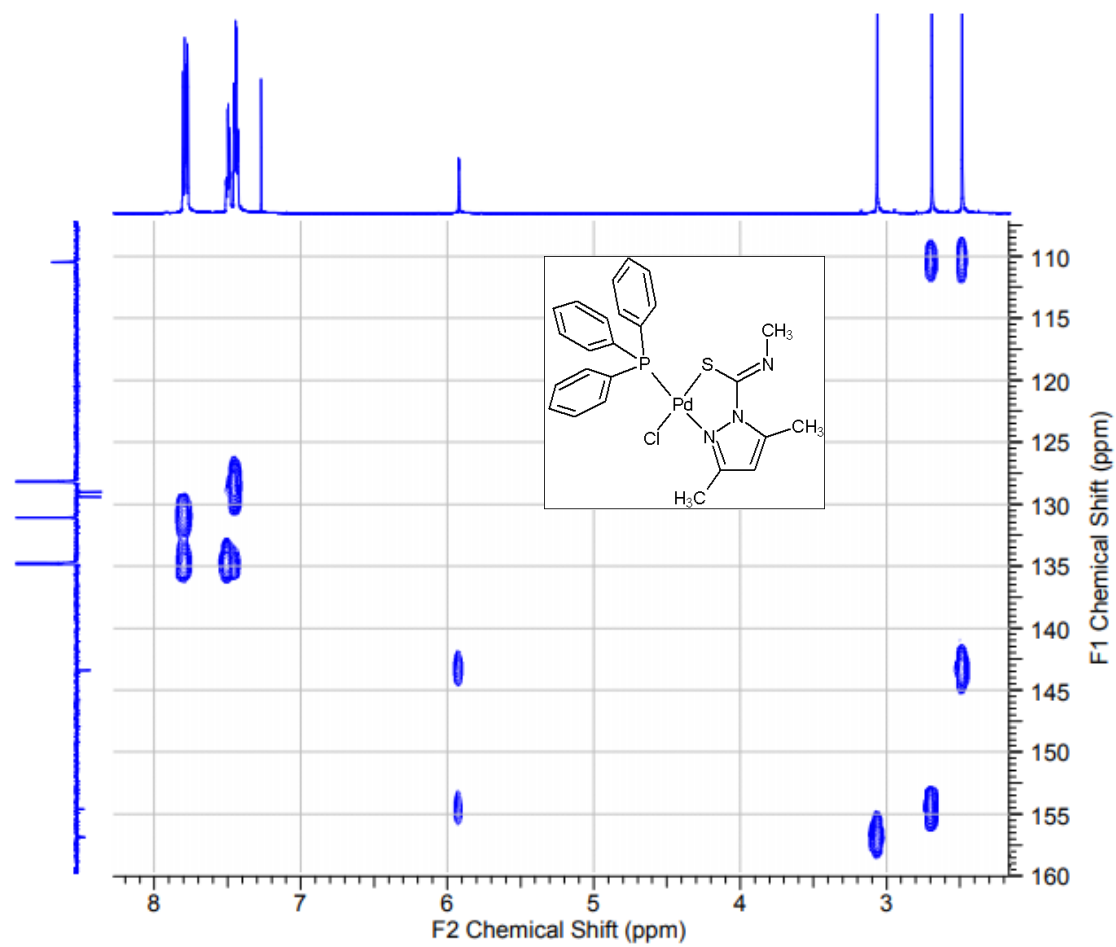

Fig. S21.  $^1\text{H}$ - $^{13}\text{C}$  HMBC NMR spectrum of complex 2

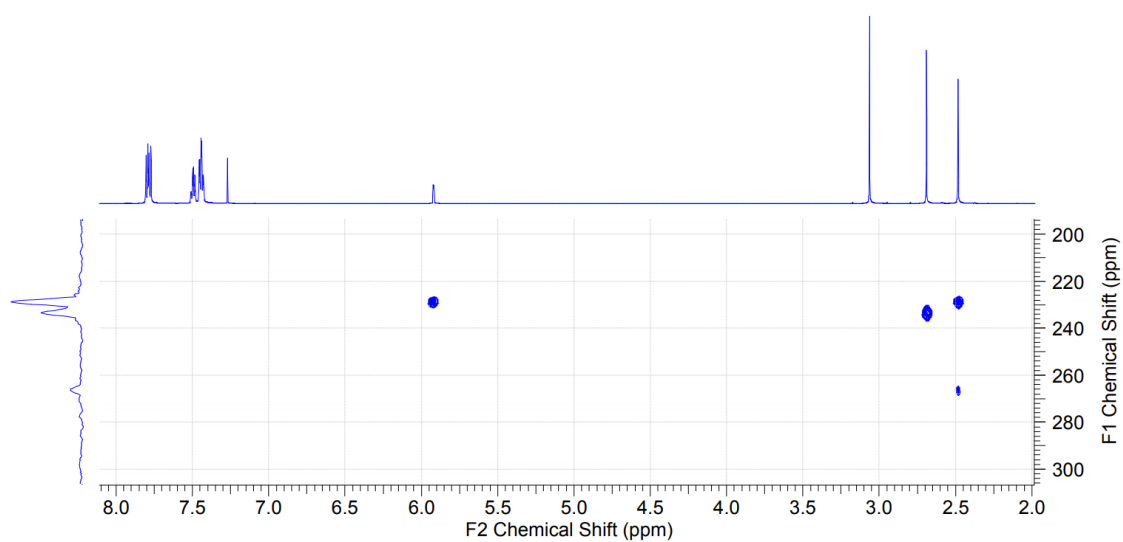

Fig. S22.  $^1\text{H}$ - $^{15}\text{N}$  HMBC NMR spectrum of complex 2



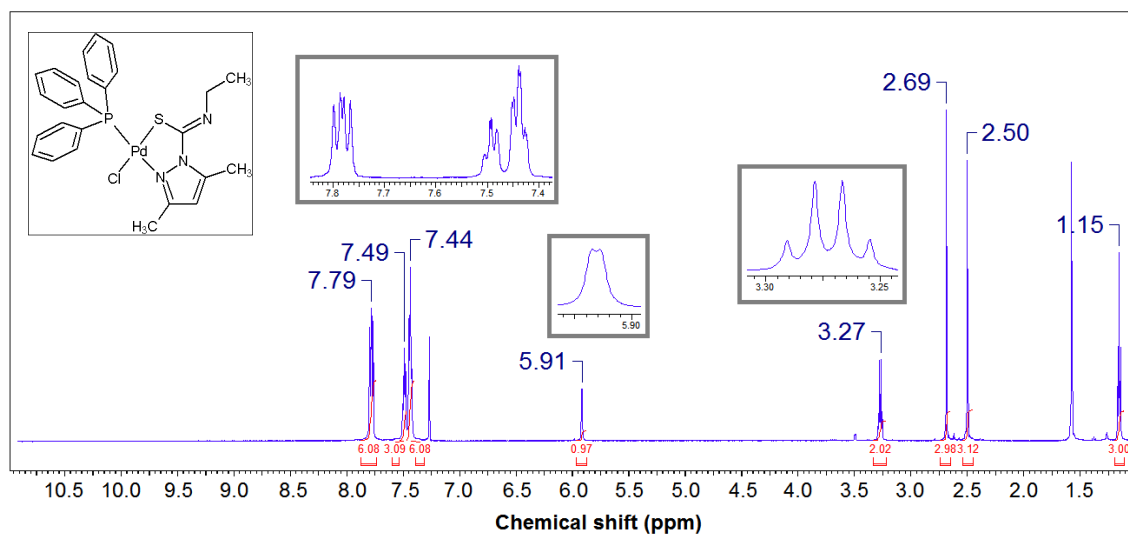Fig. S23. <sup>1</sup>H NMR spectrum of complex 3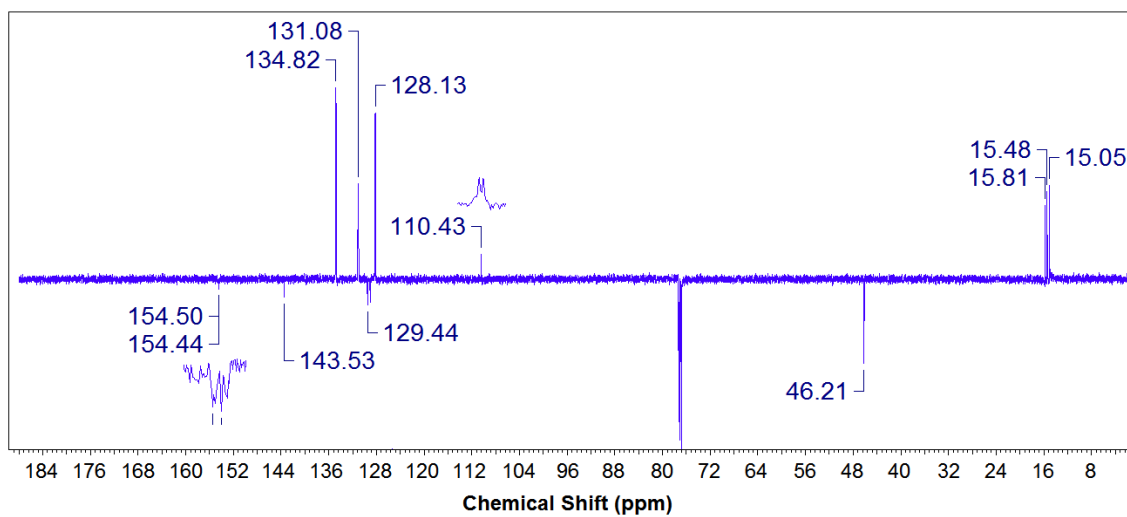

Fig. S24. DEPTQ NMR spectrum of complex 3

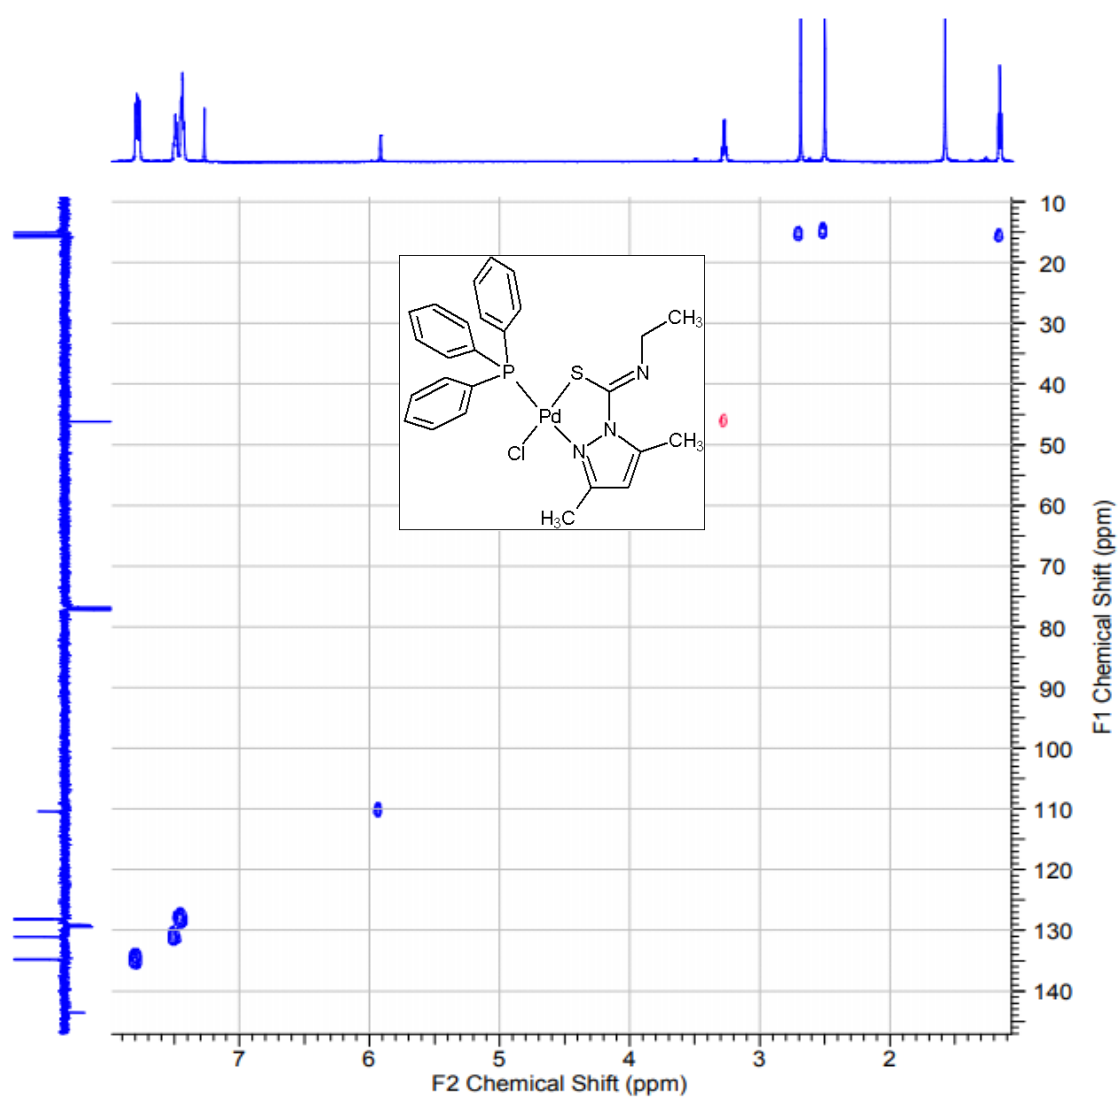

Fig. S25.  $^1\text{H}$ - $^{13}\text{C}$  HSQC NMR spectrum of complex **3**

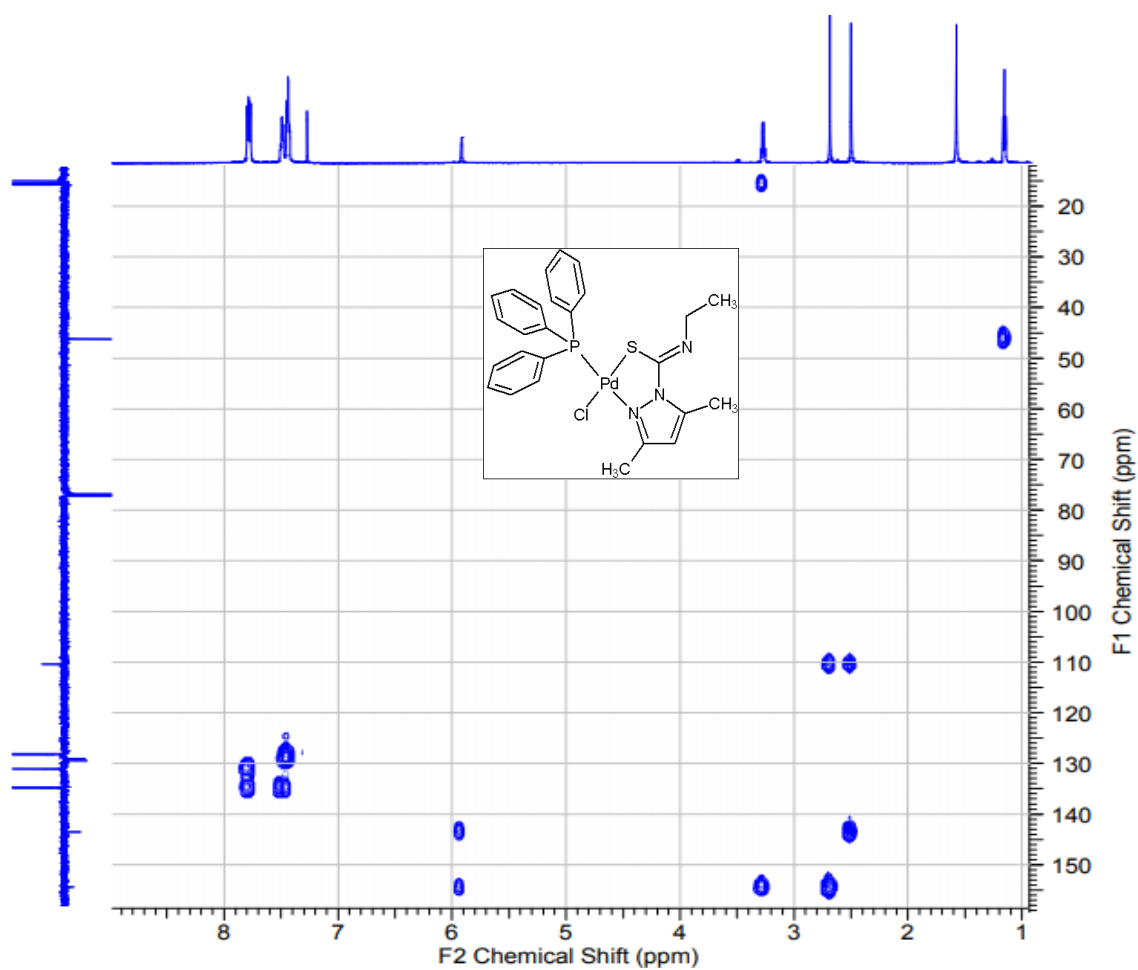

Fig. S26.  $^1\text{H}$ - $^{13}\text{C}$  HMBC NMR spectrum of complex 3

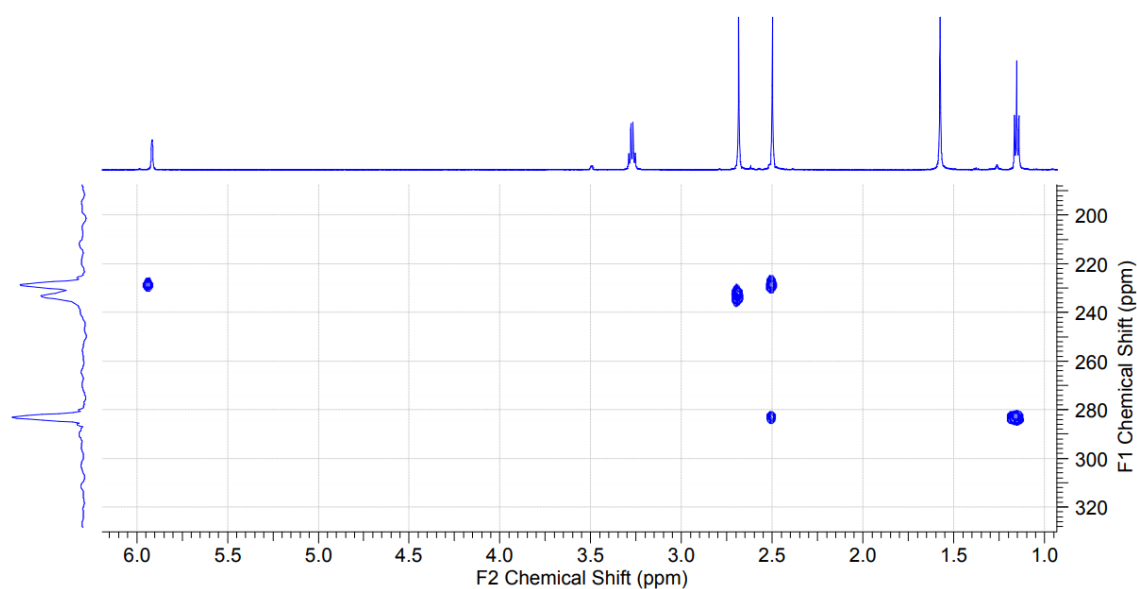

Fig. S27.  $^1\text{H}$ - $^{15}\text{N}$  HMBC NMR spectrum of complex 3

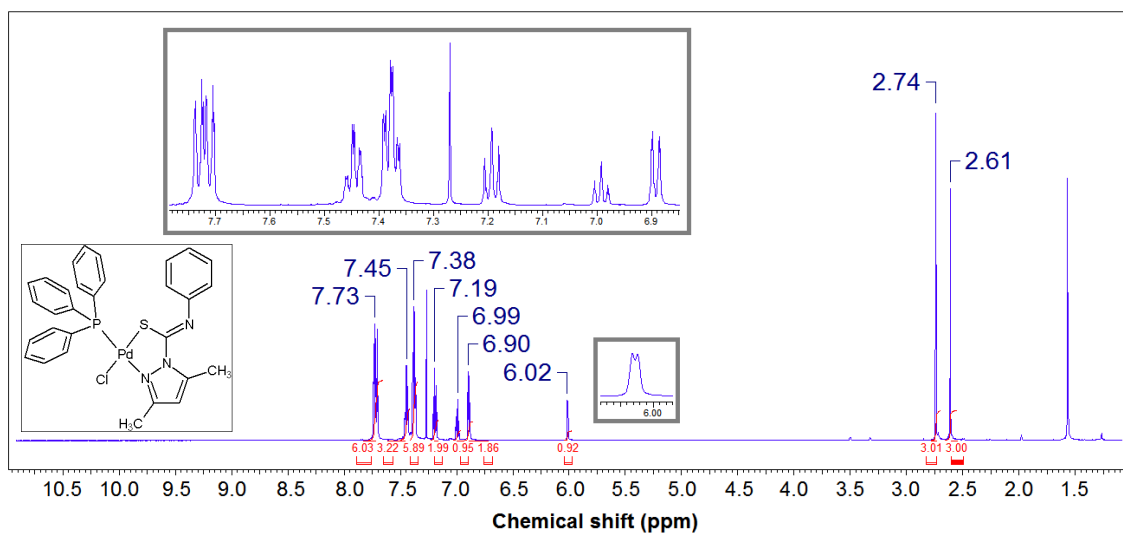Fig. S28. <sup>1</sup>H NMR spectrum of complex 4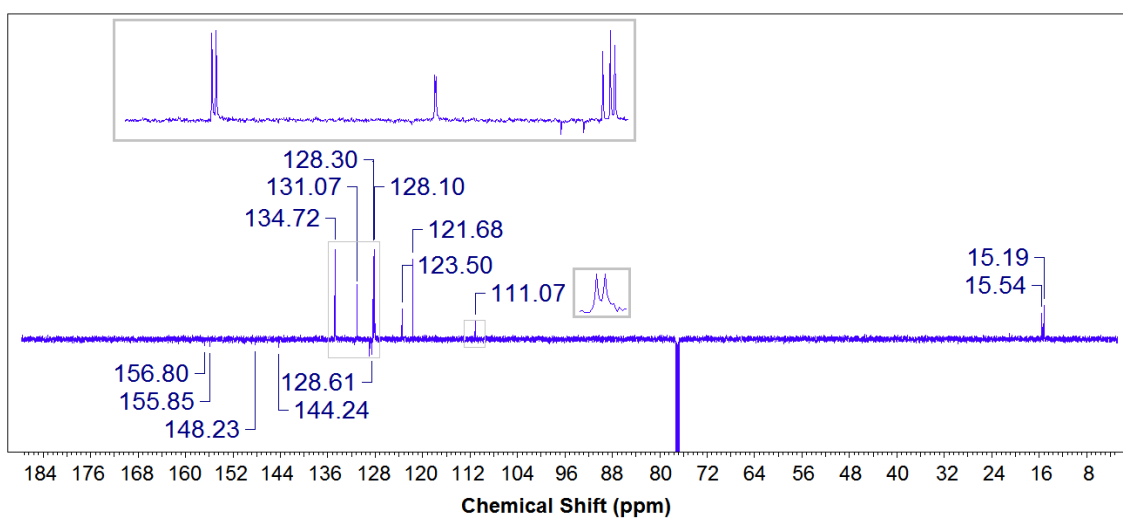

Fig. S29. DEPTQ NMR spectrum of complex 4

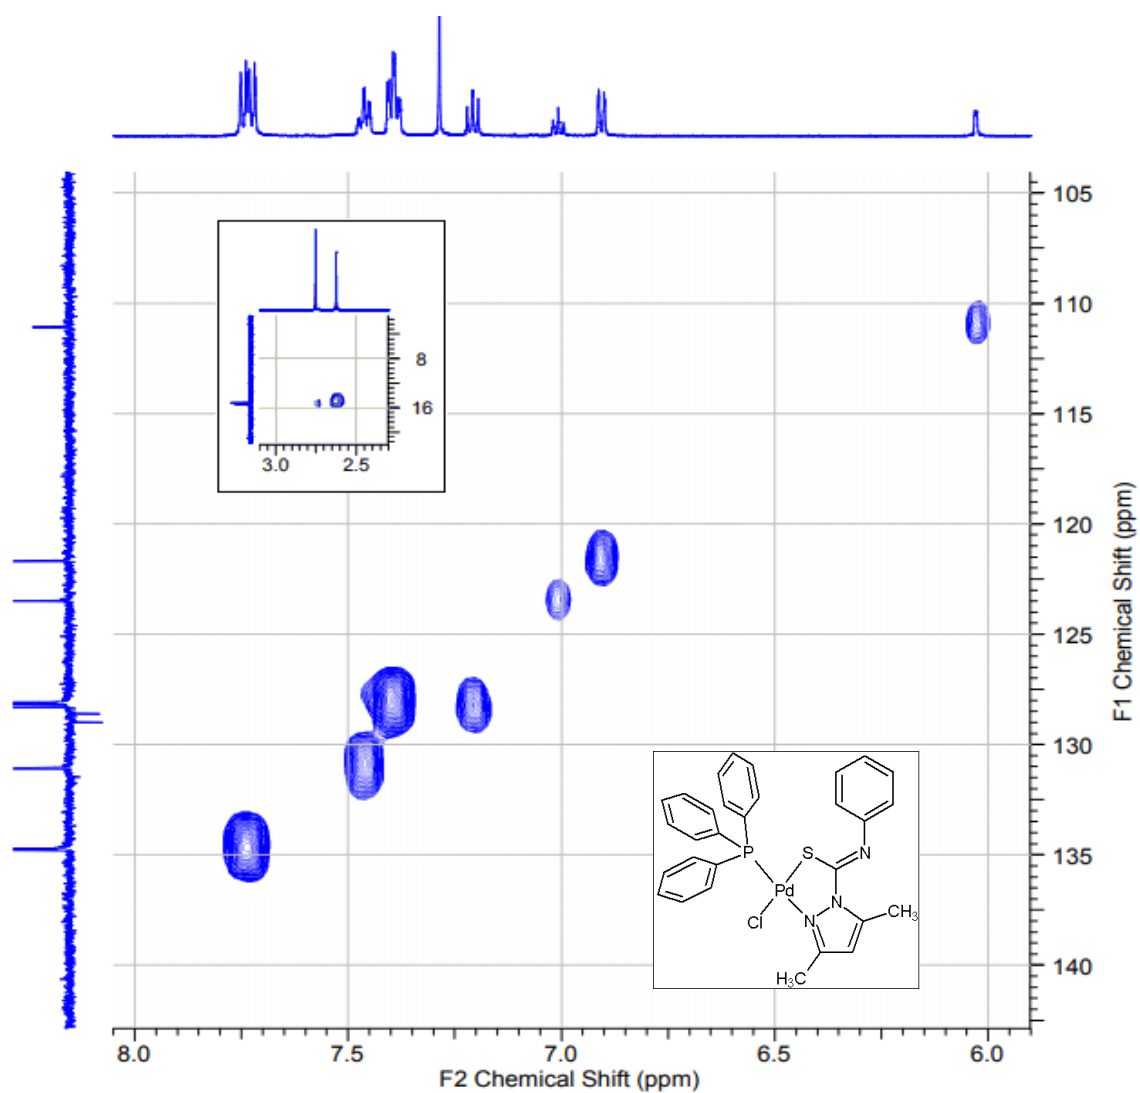

Fig. S30.  $^1\text{H}$ - $^{13}\text{C}$  HSQC NMR spectrum of complex 4

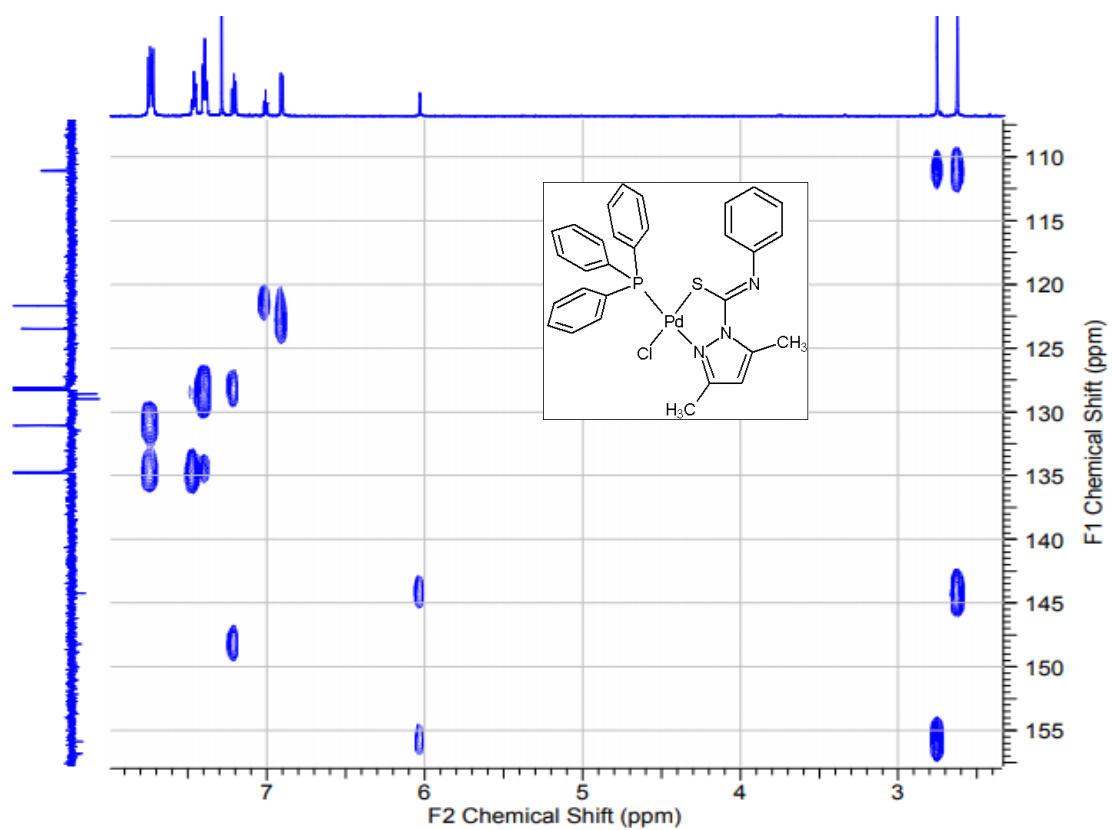

Fig. S31.  $^1\text{H}$ - $^{13}\text{C}$  HMBC NMR spectrum of complex 4

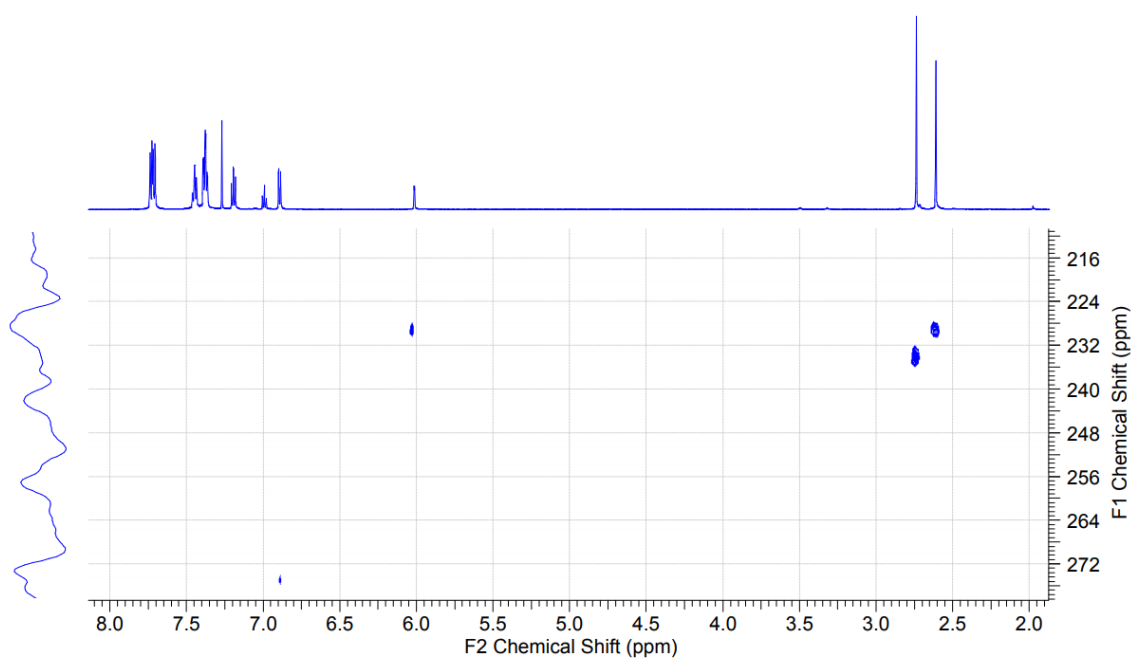

Fig. S32.  $^1\text{H}$ - $^{15}\text{N}$  HMBC NMR spectrum of complex 4

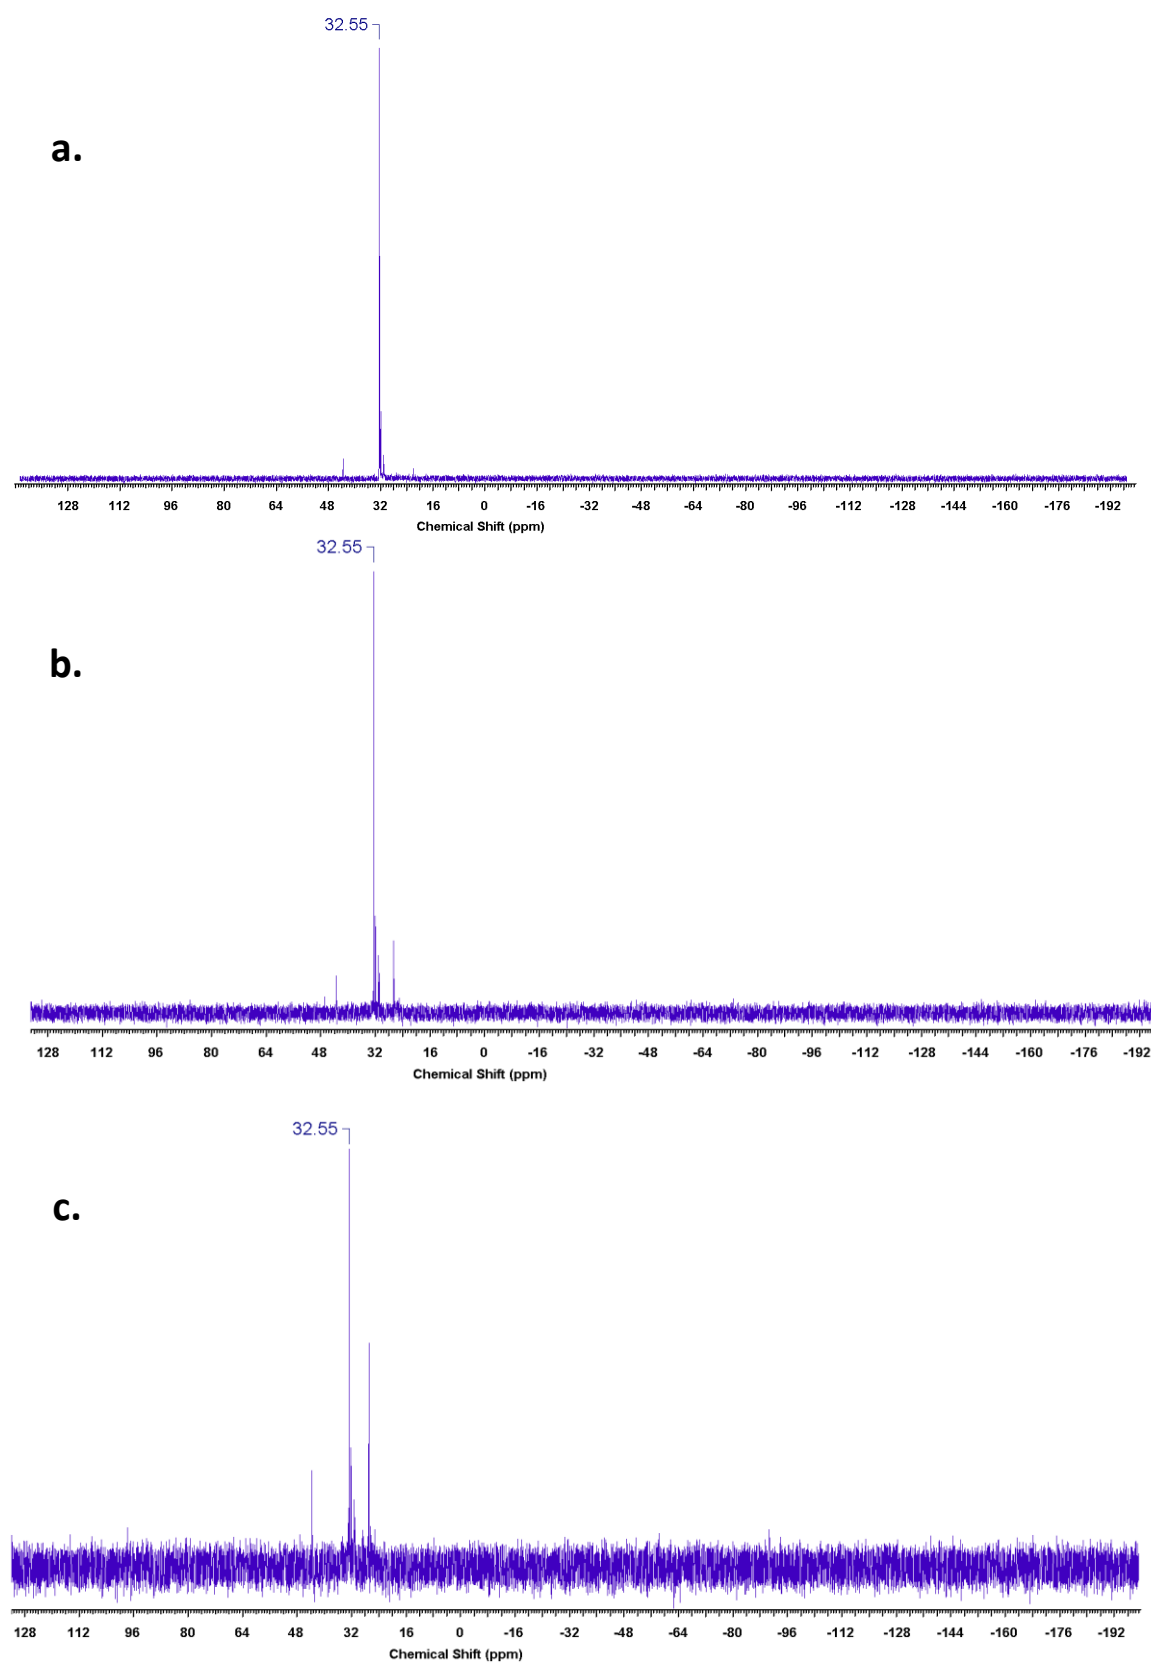

Fig. S33.  $^{31}\text{P}$  NMR – Complex 1 in  $\text{DMSO-d}_6$ ,  $37^\circ\text{C}$ , after 10 min (a), 24 h (b) and 48 h (c)

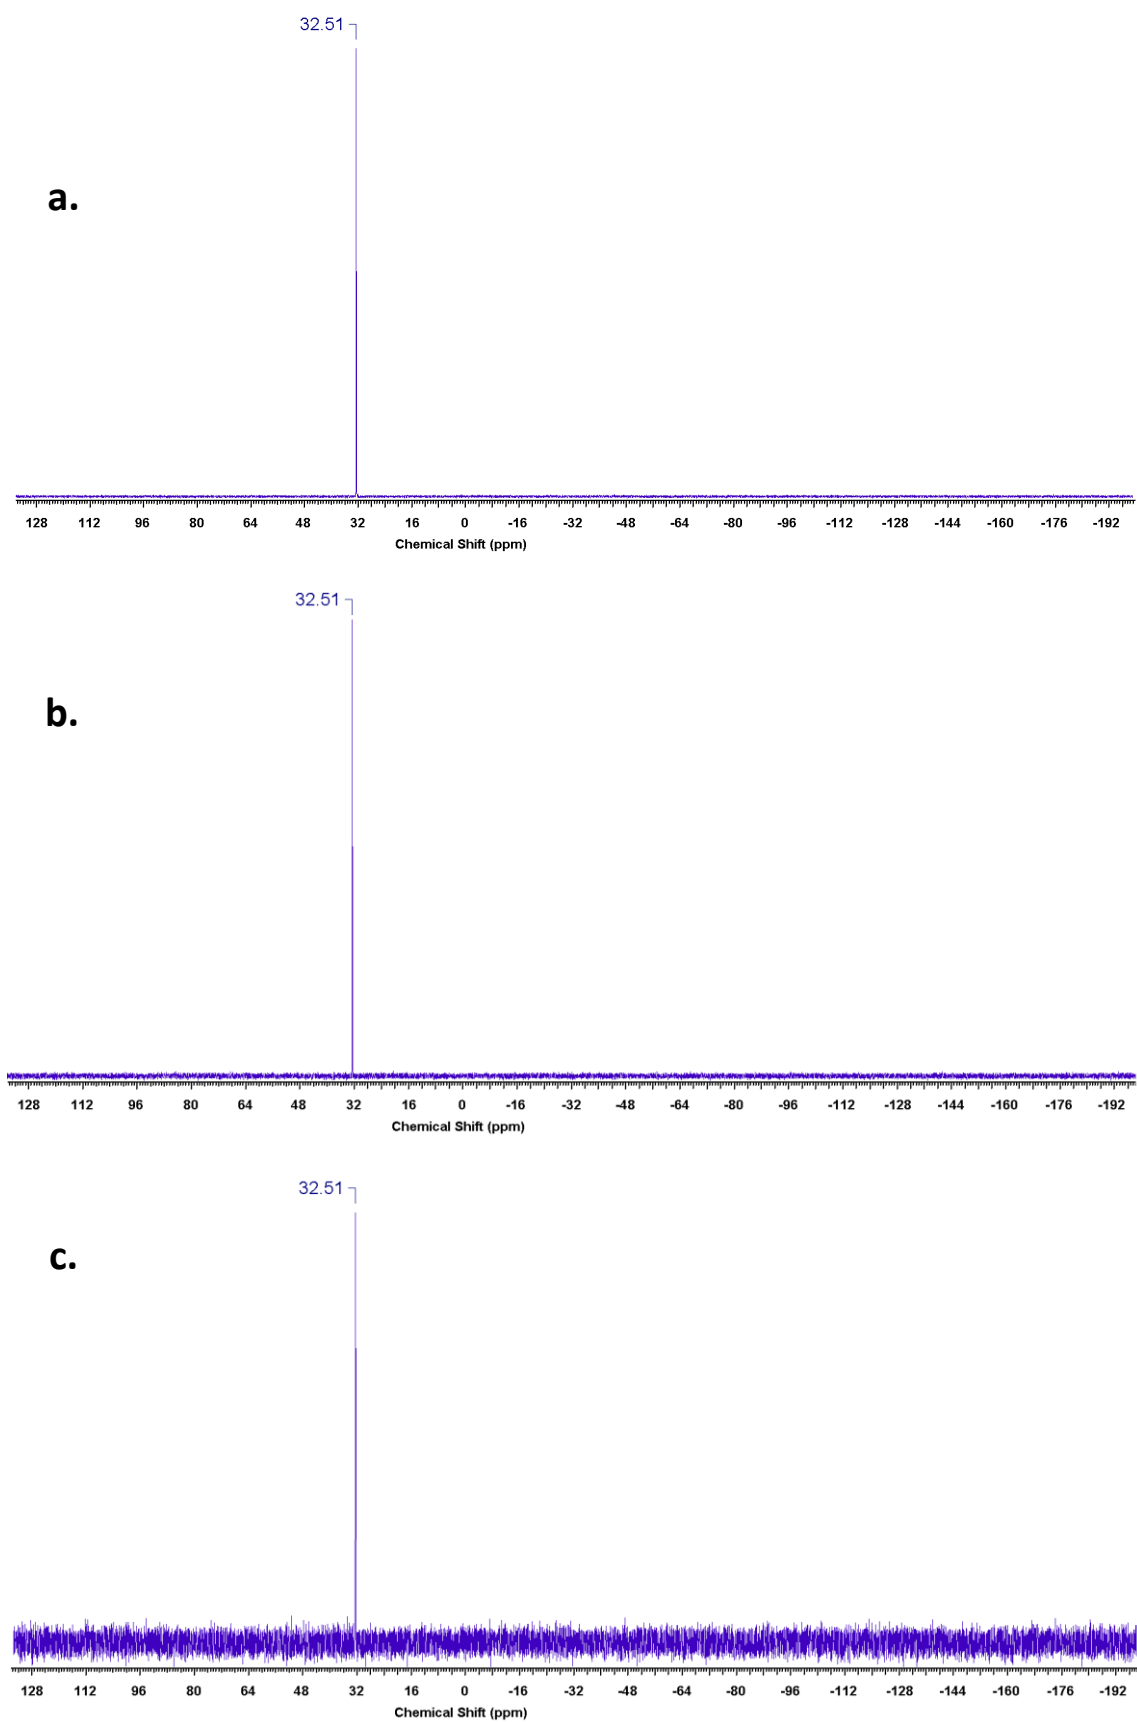

Fig. S34.  $^{31}\text{P}$  NMR – Complex 2 in  $\text{DMSO-d}_6$ ,  $37^\circ\text{C}$ , after 10 min (a), 24 h (b) and 48 h (c)



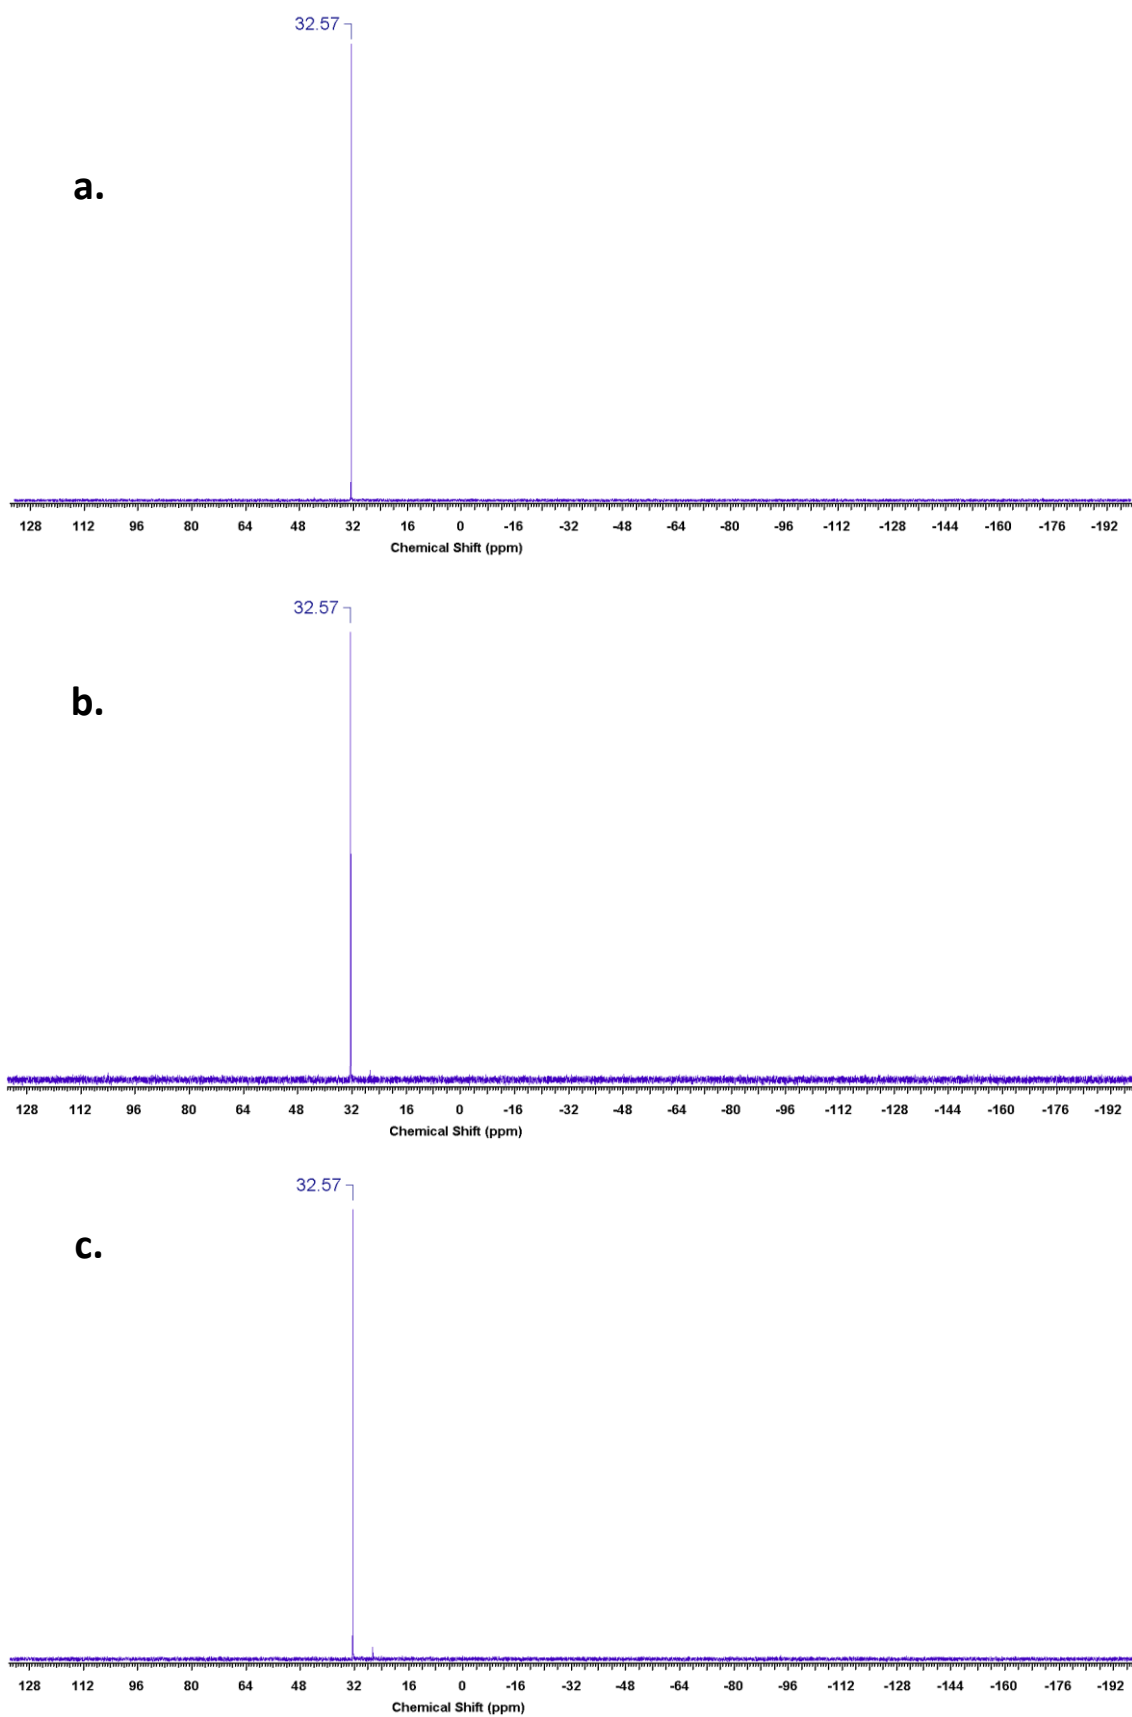

Fig. S35.  $^{31}\text{P}$  NMR – Complex **3** in  $\text{DMSO-d}_6$ ,  $37^\circ\text{C}$ , after 10 min (a), 24 h (b) and 48 h (c)

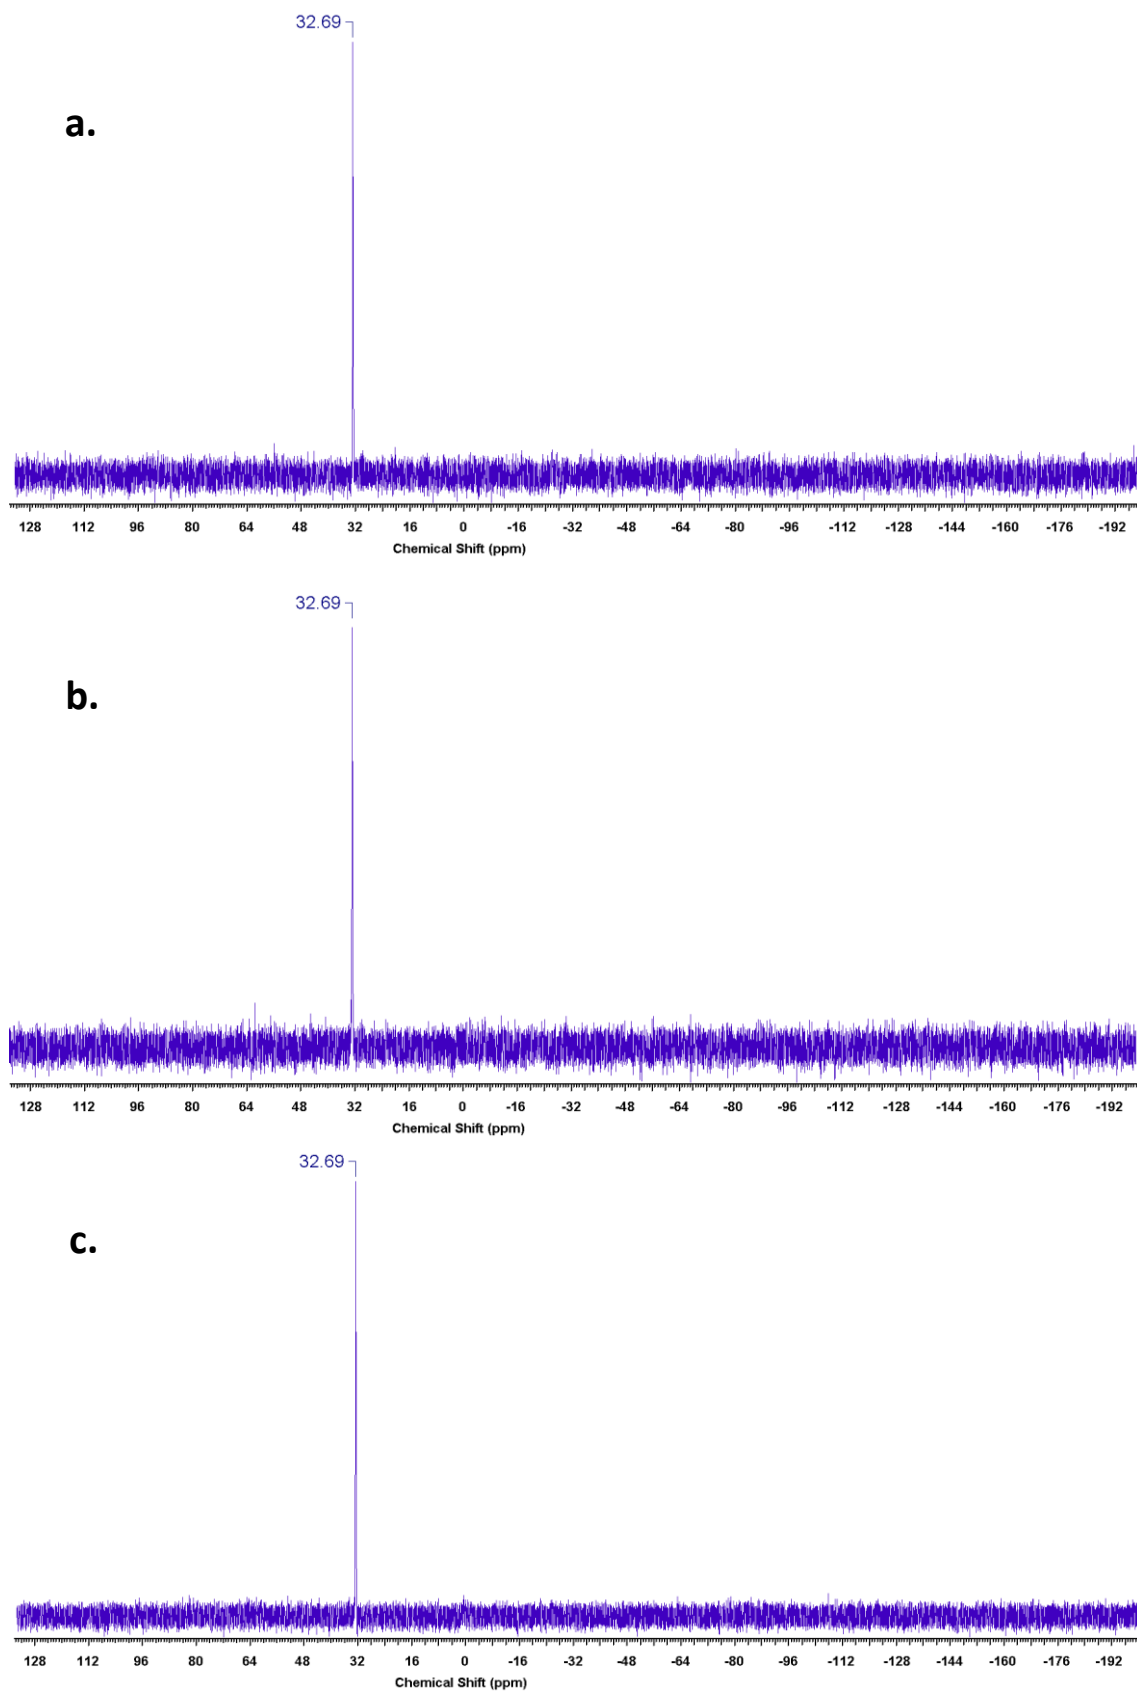

**Fig. S36.**  $^{31}\text{P}$  NMR – Complex 4 in  $\text{DMSO-d}_6$ ,  $37^\circ\text{C}$ , after 10 min (a), 24 h (b) and 48 h (c)

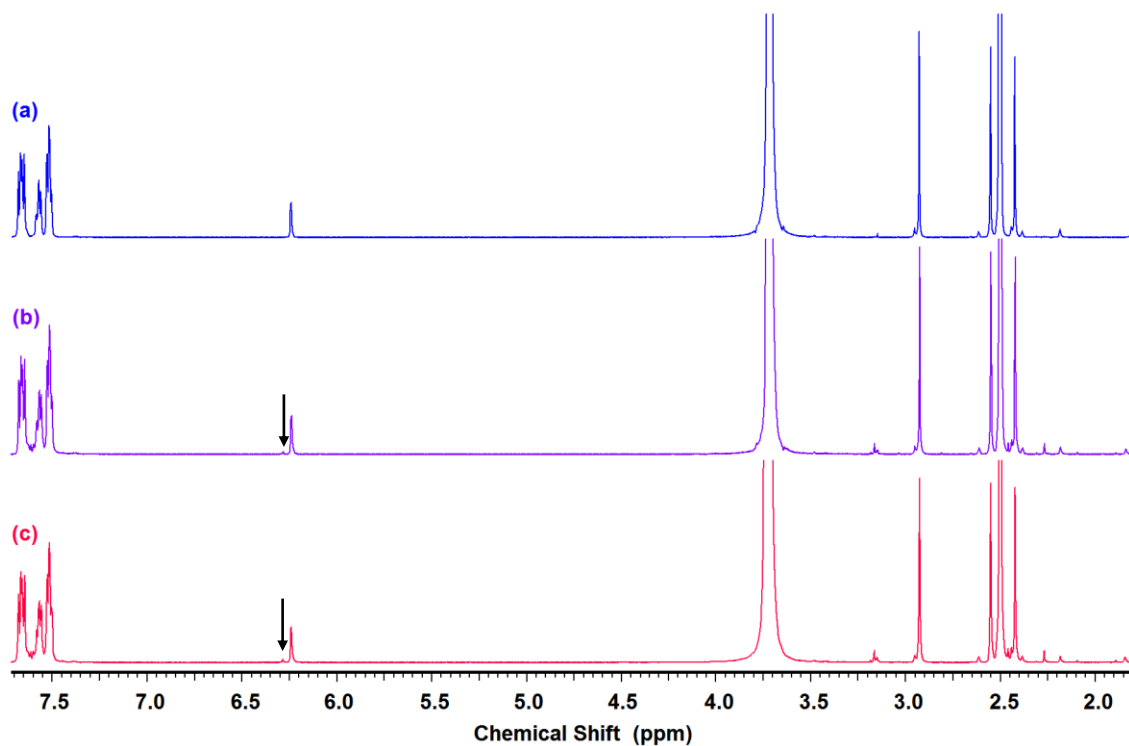

Fig. S37.  $^1\text{H}$  NMR – Complex 2 after 7 minutes (a), 24 (b) and 48 (c) hours in solution of  $\text{DMSO-d}_6/\text{D}_2\text{O}$  (70%/30%) in PBS (10  $\mu\text{M}$ ; pH = 7.3)

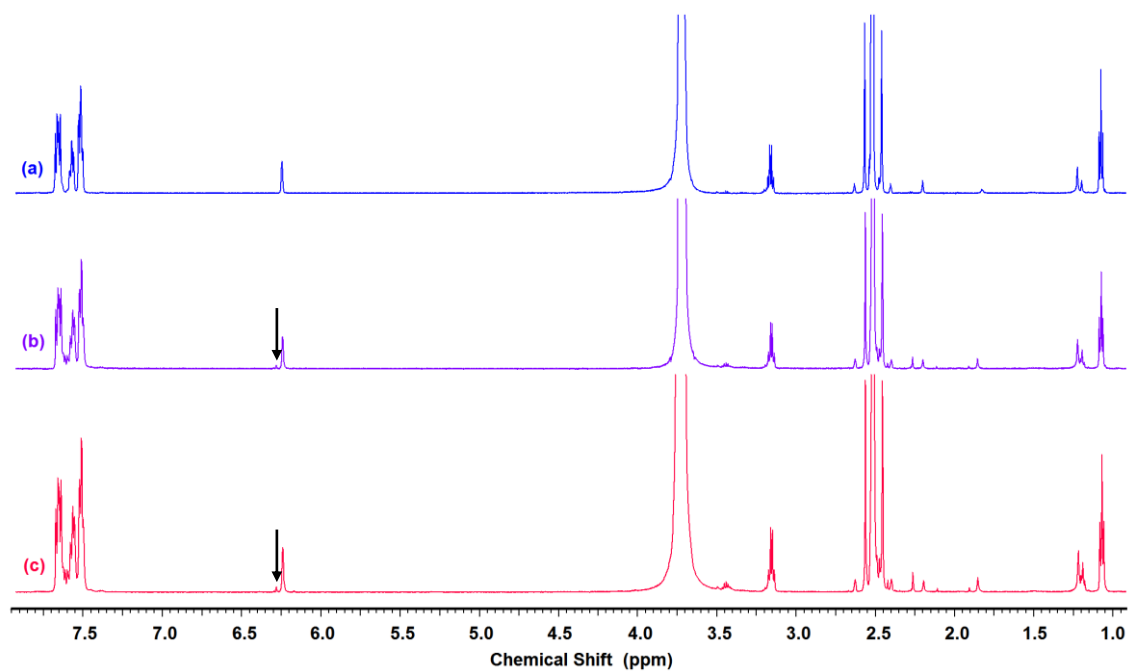

Fig. S38.  $^1\text{H}$  NMR – Complex 3 after 12 minutes (a), 24 (b) and 48 (c) hours in solution of  $\text{DMSO-d}_6/\text{D}_2\text{O}$  (70%/30%) in PBS (pH = 7.3)

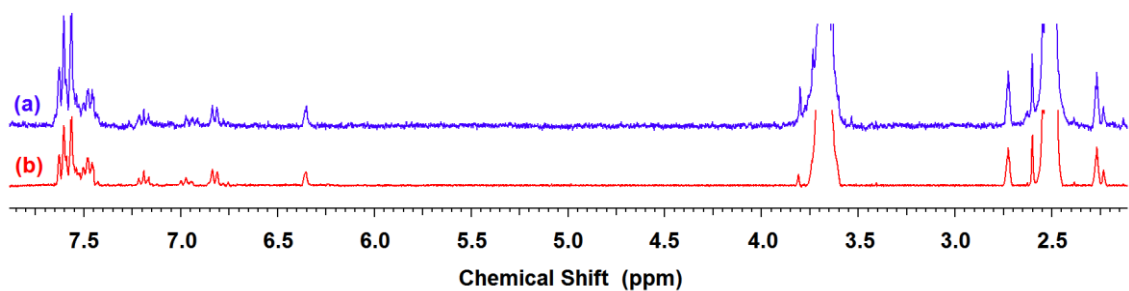

Fig. S39.  $^1\text{H}$  NMR – Complex 4 after 18 minutes (a), and 48 (b) hours in solution of  $\text{DMSO-d}_6/\text{D}_2\text{O}$  (70%/30%) in PBS (pH = 7.3)

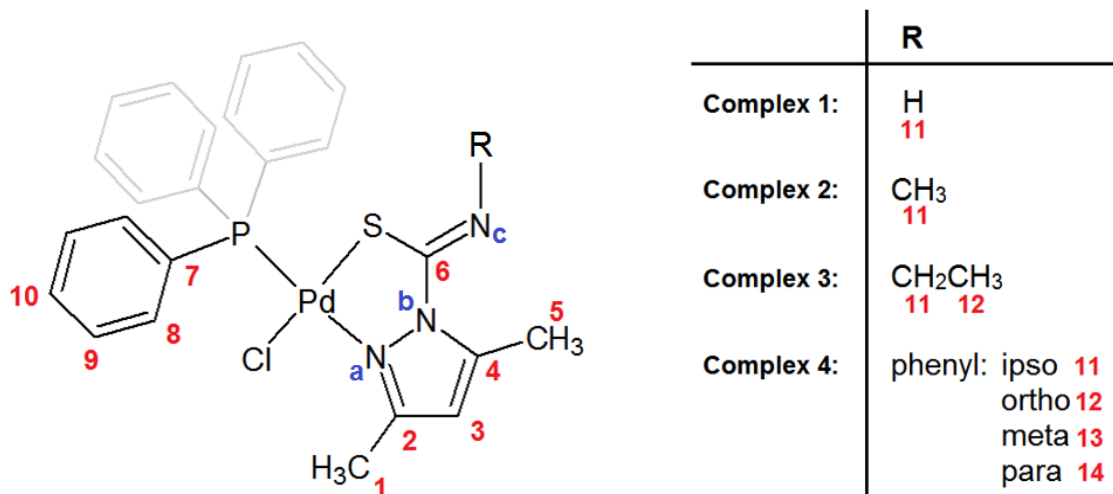

Fig. S40. Numbering for ligands and complexes for NMR assignments

Table S2. <sup>1</sup>H (600MHz) and <sup>13</sup>C-DEPTQ (150 MHz) NMR Spectroscopic Data Assignments (in DMSO-d<sub>6</sub>) for compounds 1-4. (δ in ppm, J in Hz)

| Compound | Complex 1                                      |                                                  | Complex 2                                      |                                                   | Complex 3                                      |                                                   | Complex 4                                       |                                                  |
|----------|------------------------------------------------|--------------------------------------------------|------------------------------------------------|---------------------------------------------------|------------------------------------------------|---------------------------------------------------|-------------------------------------------------|--------------------------------------------------|
| Position | <sup>1</sup> H                                 | <sup>13</sup> C                                  | <sup>1</sup> H                                 | <sup>13</sup> C                                   | <sup>1</sup> H                                 | <sup>13</sup> C                                   | <sup>1</sup> H                                  | <sup>13</sup> C                                  |
| 1        | 2.71 (s)                                       | 15.5                                             | 2.69 (s)                                       | 15.5                                              | 2.69 (s)                                       | 15.5                                              | 2.74 (s)                                        | 15.5                                             |
| 2        | -                                              | 156.1 (d)<br><sup>3</sup> J <sub>CP</sub> = 3.3  | -                                              | 154.6 (d)<br><sup>3</sup> J <sub>CP</sub> = 3.3   | -                                              | 154.5 (d)<br><sup>3</sup> J <sub>CP</sub> = 2.2   | -                                               | 155.8<br><sup>3</sup> J <sub>CP</sub> = 3.3      |
| 3        | 5.99 (d)<br><sup>5</sup> J <sub>HP</sub> = 2.0 | 111.2 (d)<br><sup>4</sup> J <sub>CP</sub> = 5.5  | 5.92 (d)<br><sup>5</sup> J <sub>HP</sub> = 2.6 | 110.5 (d)<br><sup>4</sup> J <sub>CP</sub> = 5.5   | 5.91 (d)<br><sup>5</sup> J <sub>HP</sub> = 1.8 | 110.4 (d)<br><sup>4</sup> J <sub>CP</sub> = 4.4   | 6.02 (d)<br><sup>5</sup> J <sub>HP</sub> = 2.2  | 111.1 (d)<br><sup>4</sup> J <sub>CP</sub> = 5.5  |
| 4        | -                                              | 144.4                                            | -                                              | 143.4                                             | -                                              | 143.5                                             | -                                               | 144.2                                            |
| 5        | 2.55 (s)                                       | 14.4                                             | 2.48 (s)                                       | 14.9                                              | 2.50 (s)                                       | 15.05                                             | 2.61 (s)                                        | 15.2                                             |
| 6        | -                                              | 164.3 (d)<br><sup>3</sup> J <sub>CP</sub> = 5.5  | -                                              | 156.9 (d)<br><sup>3</sup> J <sub>CP</sub> = 5.5   | -                                              | 154.4 (d)<br><sup>3</sup> J <sub>CP</sub> = 5.5   | -                                               | 156.8 (d)<br><sup>3</sup> J <sub>CP</sub> = 4.4  |
| 7        | -                                              | 128.8 (d)<br><sup>1</sup> J <sub>CP</sub> = 57.5 | -                                              | 129.03 (d)<br><sup>1</sup> J <sub>CP</sub> = 57.5 | -                                              | 129.44 (d)<br><sup>1</sup> J <sub>CP</sub> = 57.5 | -                                               | 128.6 (d)<br><sup>1</sup> J <sub>CP</sub> = 57.5 |
| 8        | 7.77 (m)                                       | 134.6 (d)<br><sup>2</sup> J <sub>CP</sub> = 11.1 | 7.79 (m)                                       | 134.8 (d)<br><sup>2</sup> J <sub>CP</sub> = 11.1  | 7.79 (m)                                       | 134.8 (d)<br><sup>2</sup> J <sub>CP</sub> = 11.1  | 7.73 (m)                                        | 134.7 (d)<br><sup>2</sup> J <sub>CP</sub> = 11.1 |
| 9        | 7.45 (m)                                       | 128.2 (d)<br><sup>3</sup> J <sub>CP</sub> = 12.2 | 7.44 (m)                                       | 128.2 (d)<br><sup>3</sup> J <sub>CP</sub> = 11.1  | 7.44 (m)                                       | 128.1 (d)<br><sup>3</sup> J <sub>CP</sub> = 12.2  | 7.38 (m)                                        | 128.1 (d)<br><sup>3</sup> J <sub>CP</sub> = 11.1 |
| 10       | 7.51 (m)                                       | 131.2 (d)<br><sup>4</sup> J <sub>CP</sub> = 2.2  | 7.49 (m)                                       | 131.1 (d)<br><sup>4</sup> J <sub>CP</sub> = 3.3   | 7.49 (m)                                       | 131.1 (d)<br><sup>4</sup> J <sub>CP</sub> = 2.2   | 7.45 (m)                                        | 131.1 (d)<br><sup>4</sup> J <sub>CP</sub> = 3.3  |
| 11       | 8.38 (br)                                      | -                                                | 3.06 (s)                                       | 38.7                                              | 3.27 (q)<br><sup>3</sup> J <sub>HH</sub> = 7.2 | 46.2                                              | -                                               | 148.2                                            |
| 12       | -                                              | -                                                | -                                              | -                                                 | 1.15 (t)<br><sup>3</sup> J <sub>HH</sub> = 7.2 | 15.8                                              | 6.90 (m)                                        | 121.7                                            |
| 13       | -                                              | -                                                | -                                              | -                                                 | -                                              | -                                                 | 7.19 (m)                                        | 128.3                                            |
| 14       | -                                              | -                                                | -                                              | -                                                 | -                                              | -                                                 | 6.99 (tt)<br><sup>3</sup> J <sub>HH</sub> = 7.3 | 123.5                                            |

**Table S3.** HMBC  $^{15}\text{N}$  and  $^{31}\text{P}$  NMR Spectroscopic Data Assignments (in DMSO- $d_6$ ) for compounds **1-4**. ( $\delta$  in ppm)

| Compound              | Complex 1 | Complex 2 | Complex 3 | Complex 4 |
|-----------------------|-----------|-----------|-----------|-----------|
| $^{15}\text{N}_{(a)}$ | -         | 233.4     | 233.2     | 234.1     |
| $^{15}\text{N}_{(b)}$ | -         | 228.6     | 228.6     | 229.1     |
| $^{15}\text{N}_{(c)}$ | -         | 266.2     | 283.1     | 274.9     |
| $^{31}\text{P}$       | 32.55     | 32.51     | 32.57     | 32.69     |

**S2.2. Infrared Spectroscopy**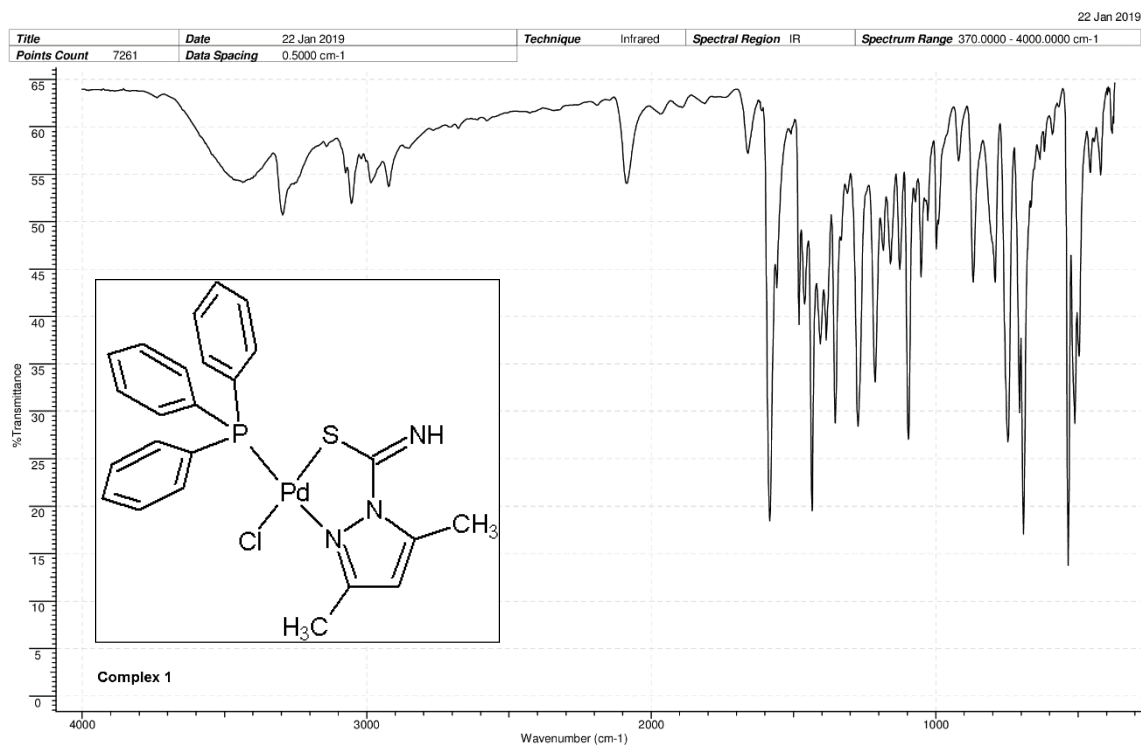**Fig. S41.** Infrared spectra of complex **1**

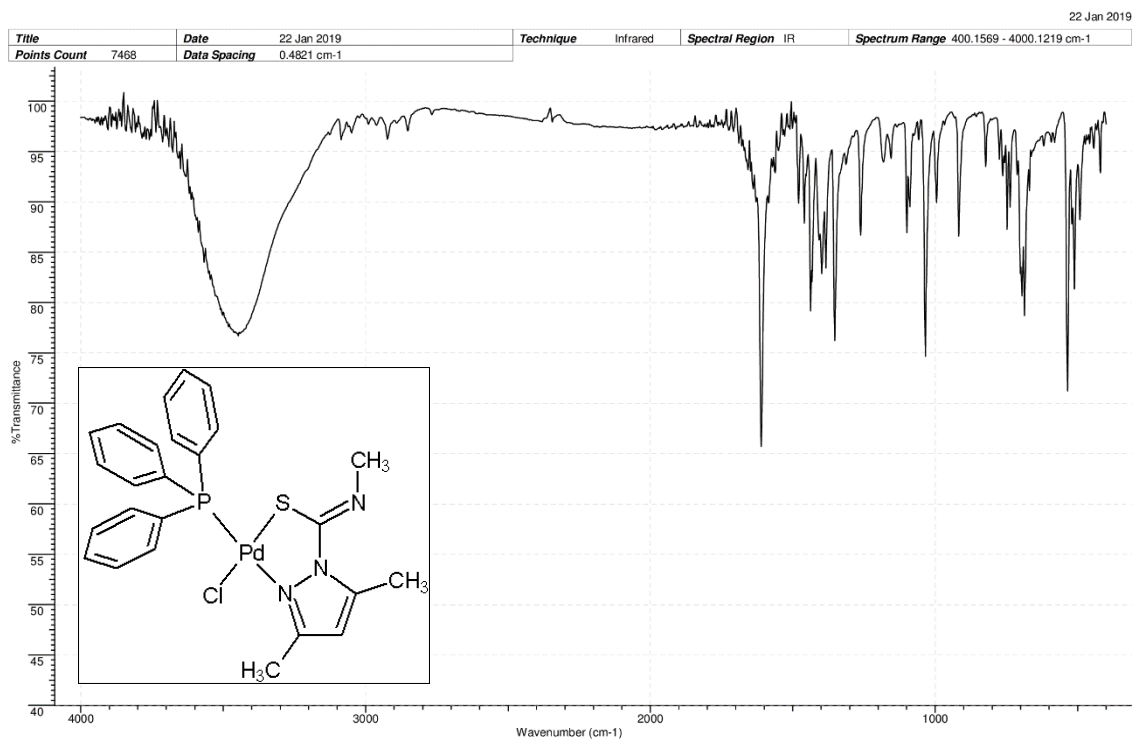

Fig. S42. Infrared spectra of complex 2

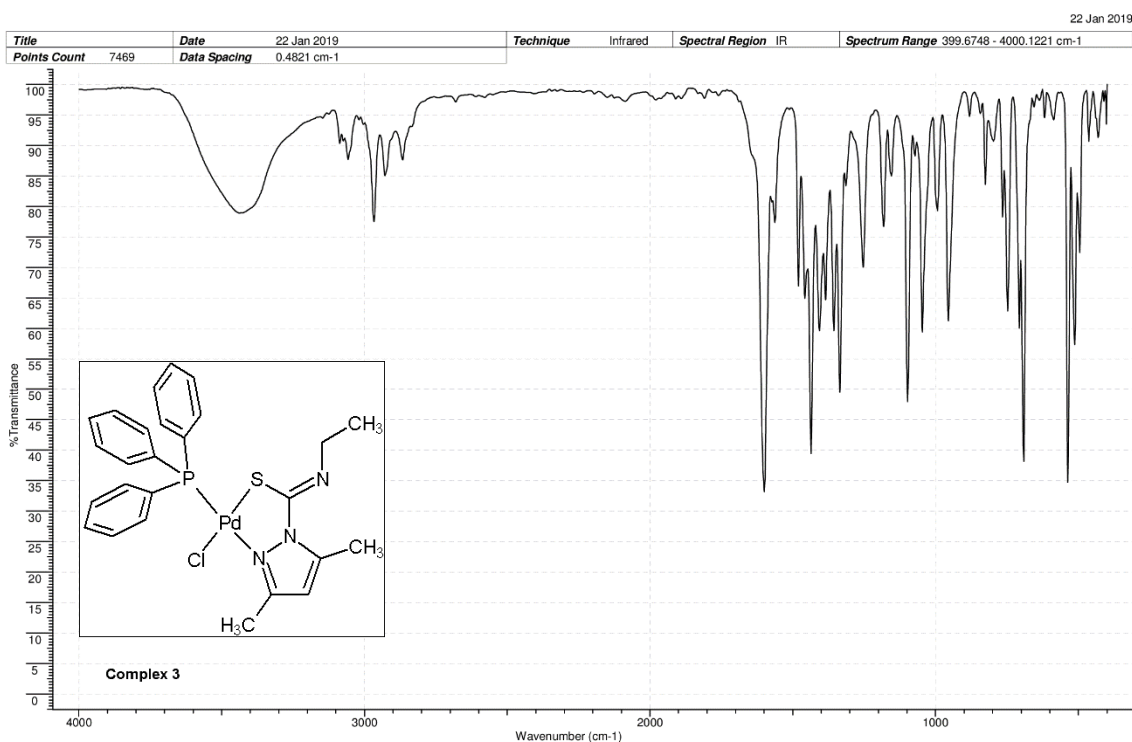

Fig. S43. Infrared spectra of complex 3

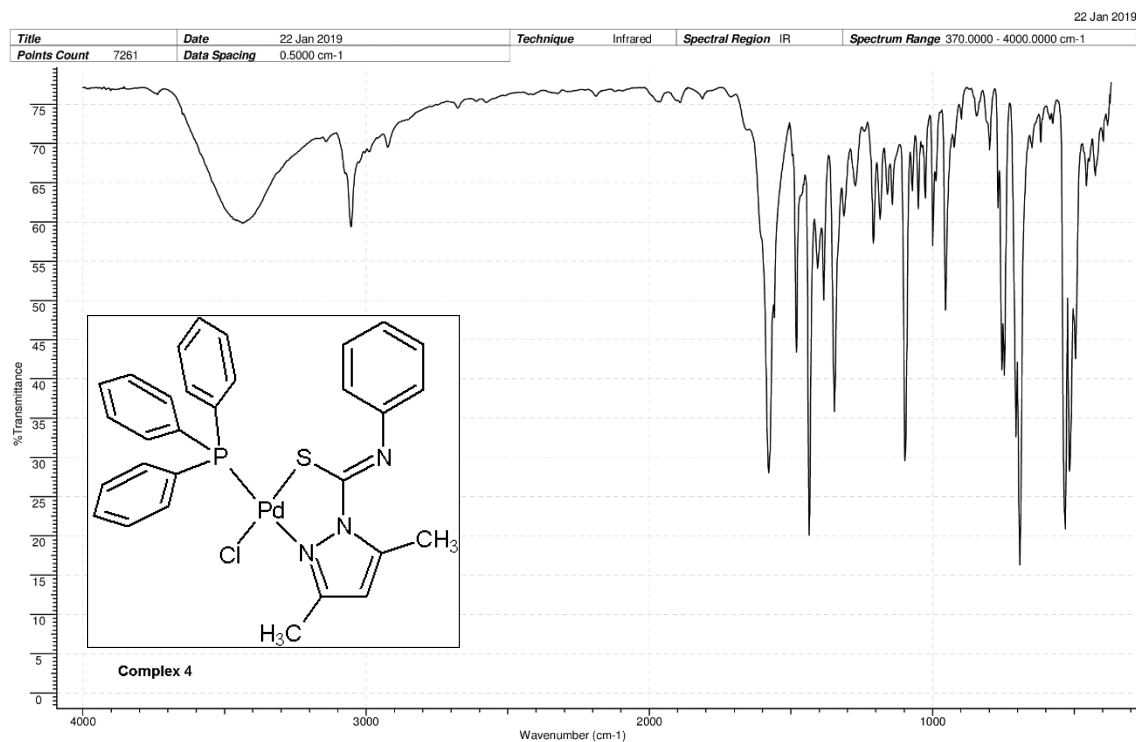

Fig. S44. Infrared spectra of complex 4

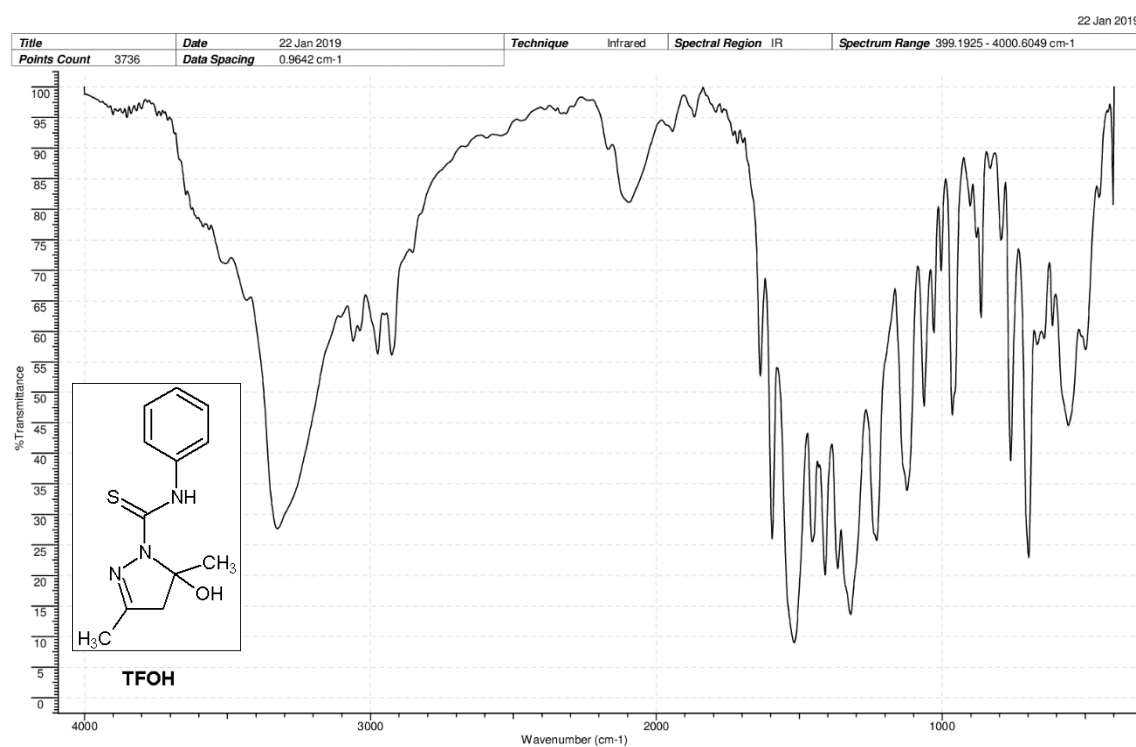Fig. S45. Infrared spectra of compound L<sub>4</sub>'

**Table S4.** Infrared Spectroscopic Data Assignments (in KBr) for synthesized N,S-ligands and complexes (wavenumbers, cm<sup>-1</sup>).

| L <sub>1</sub> | 1    | L <sub>2</sub> | 2    | L <sub>3</sub> | 3    | L <sub>4</sub> ' | 4    | vibrational modes                  |
|----------------|------|----------------|------|----------------|------|------------------|------|------------------------------------|
|                |      |                |      |                |      | 3250             |      | <b>νOH</b>                         |
| 3386           |      |                |      |                |      |                  |      | <b>νNH</b>                         |
| 3240           | 3295 | 3328           | -    | 3325           | -    | 3325             |      | <b>νNH</b>                         |
| 3134           | 3074 |                | 3085 |                | 3086 | 3060             |      | <b>νCH<sub>sp2</sub></b>           |
|                | 3054 |                | 3049 | -              | 3057 | 3036             | 3053 | <b>νCH<sub>sp2</sub></b>           |
| 2990           | 2985 | 2976           | 2962 | 2975           | 2967 | 2974             |      | <b>νCH<sub>sp3</sub></b>           |
| 2925           | 2923 | 2925           | 2923 | 2927           | 2928 | 2925             | 2923 | <b>νCH<sub>sp3</sub></b>           |
|                |      |                | 2852 | 2876           | 2867 |                  |      | <b>νCH<sub>sp3</sub></b>           |
|                |      |                | -    | 2584           | -    |                  |      | <b>νSH</b>                         |
| 1577           | 1436 | 1574           | 1437 | 1577           | 1436 | 1593             | 1435 | <b>νCN<sub>ring</sub></b>          |
| 1599           | 2086 | 1523           | 1610 | 1516           | 1600 | 1513             | 1578 | <b>νCN<sub>(thioamide I)</sub></b> |
|                | 1481 |                | 1479 |                | 1480 |                  | 1480 | <b>νCC<sub>PPh3</sub></b>          |
| 1341           | 1353 | 1336           | 1352 | 1335           | 1335 | 1336             | 1346 | <b>νCC<sub>pyrazole</sub></b>      |
| 1250           | 1273 | 1260           | 1262 | 1245           | 1253 | 1245             | 1273 | <b>δCN + δCH + δNH</b>             |
|                | 1096 | -              | 1099 | -              | 1098 | -                | 1097 | <b>q<sub>PPh3</sub></b>            |
| 1029           | 1051 | 1032           | 1034 | 1035           | 1046 | 1054             | 1050 | <b>νNN<sub>ring</sub></b>          |
| 973            |      | 971            | -    | 976            | -    | 965              |      | <b>νCS + δsNH</b>                  |
| 880            | 920  | 936            | 916  | 961            | 955  | 883              | 954  | <b>δrCH</b>                        |
| 808            | 691  | 798            | 695  | 801            | 705  | 801              | 692  | <b>νCS</b>                         |
|                | 746  | -              | 747  | -              | 748  | -                | 746  | <b>δCH<sub>PPh3</sub></b>          |
|                |      | -              |      | -              |      | 698              | 755  | <b>δCH<sub>Ph</sub></b>            |



## S2.3. MS-ESI Spectroscopy

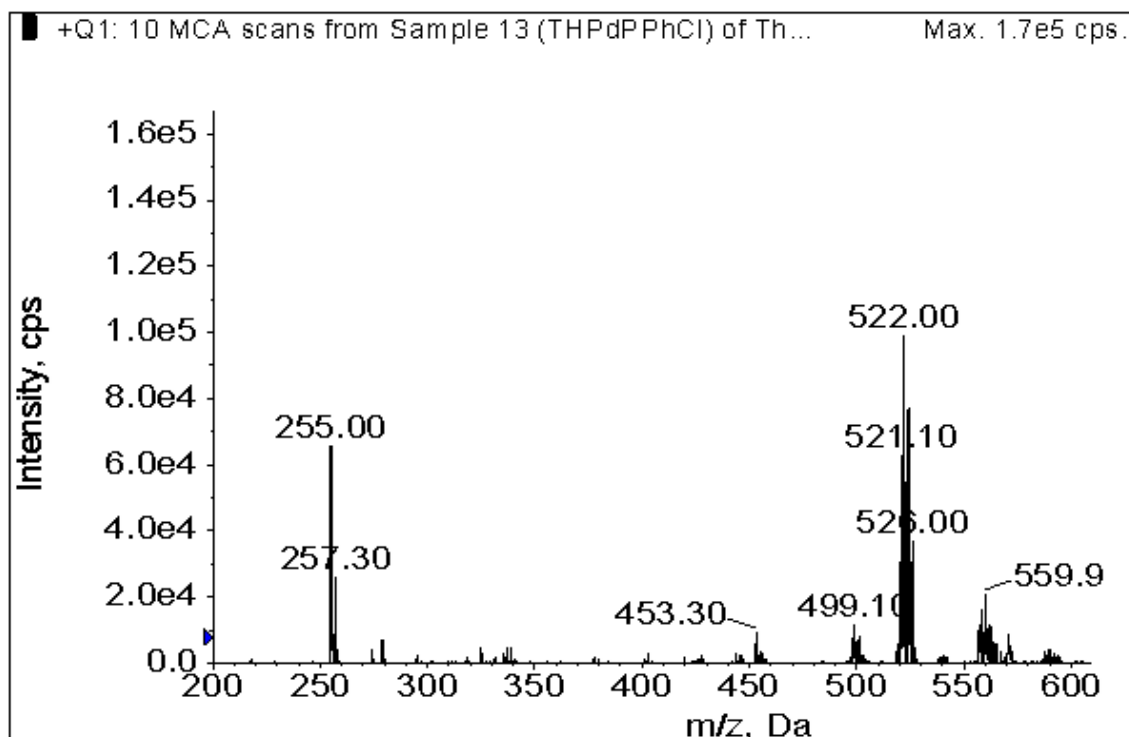

Fig. S46. Mass spectra of compound 1

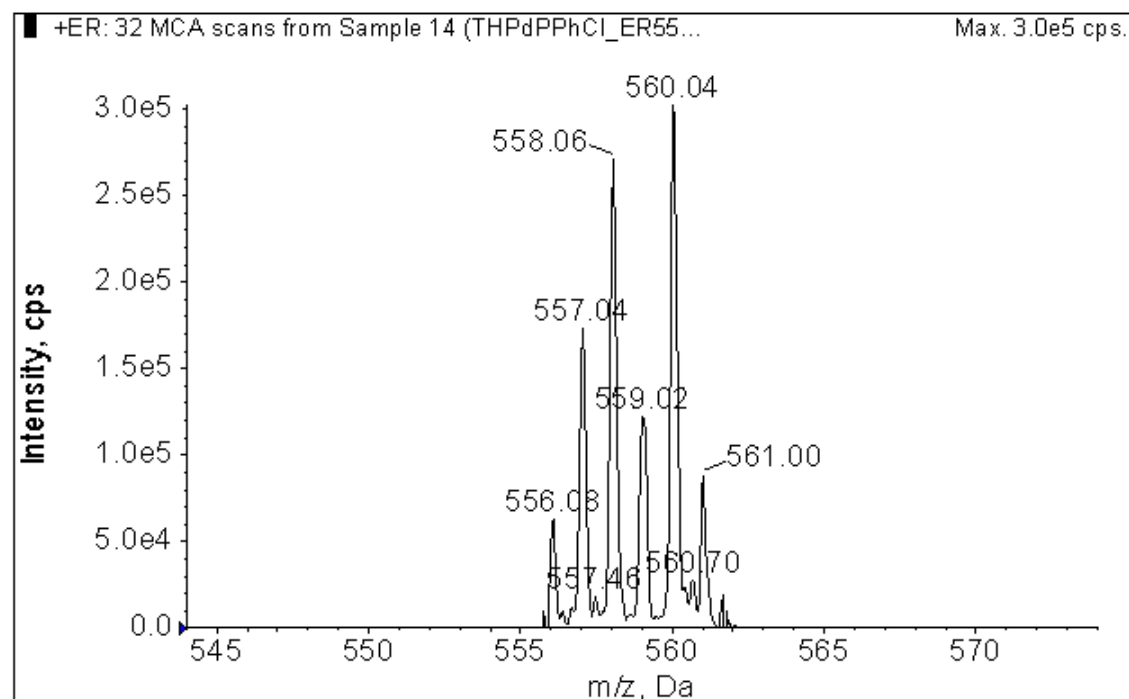

Fig. S47. Enhanced mass resolution spectra of compound 1

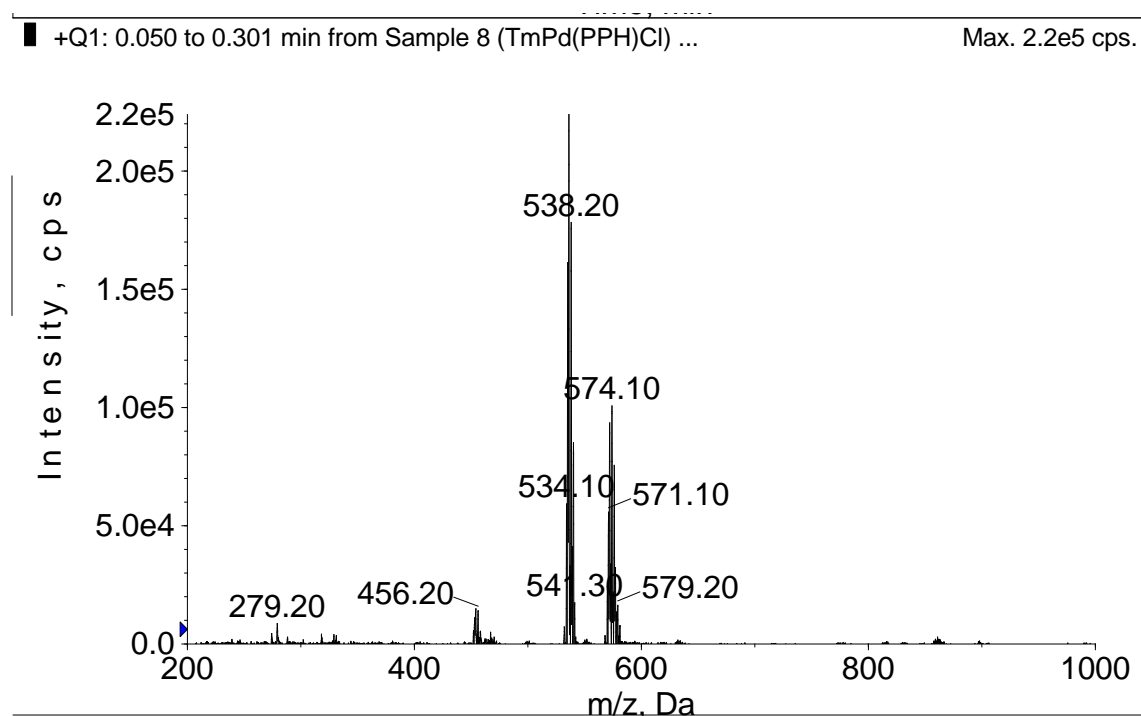

Fig. S48. Mass spectra of compound 2

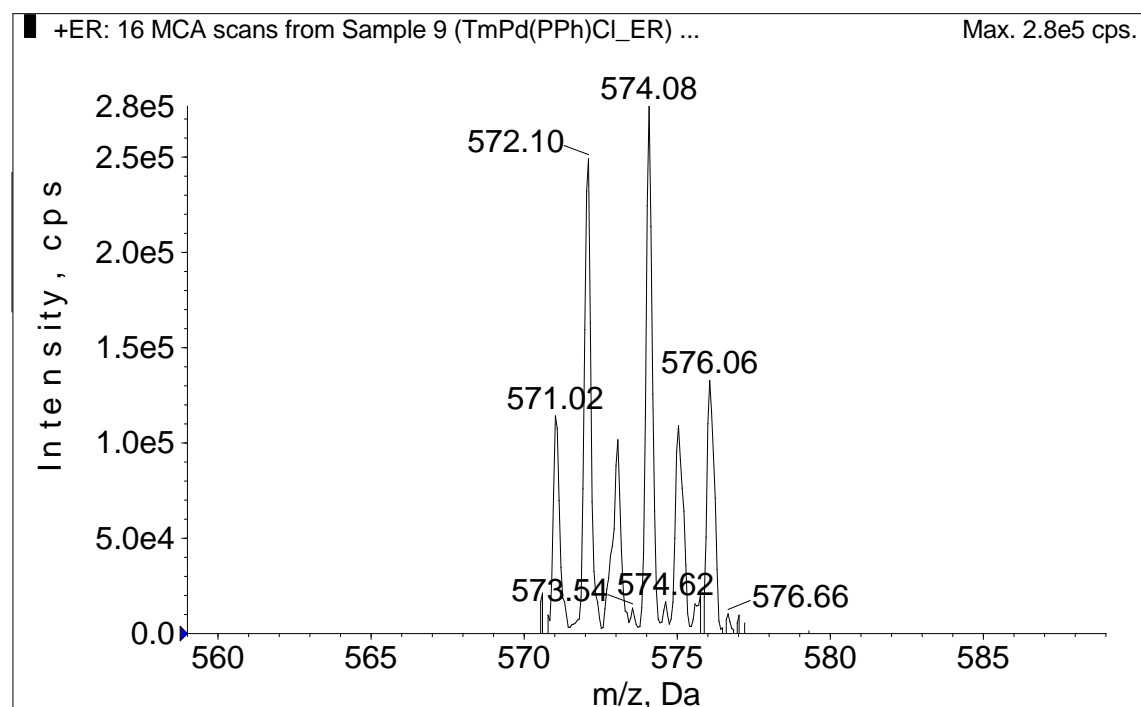

Fig. S49. Enhanced mass resolution spectra of compound 2

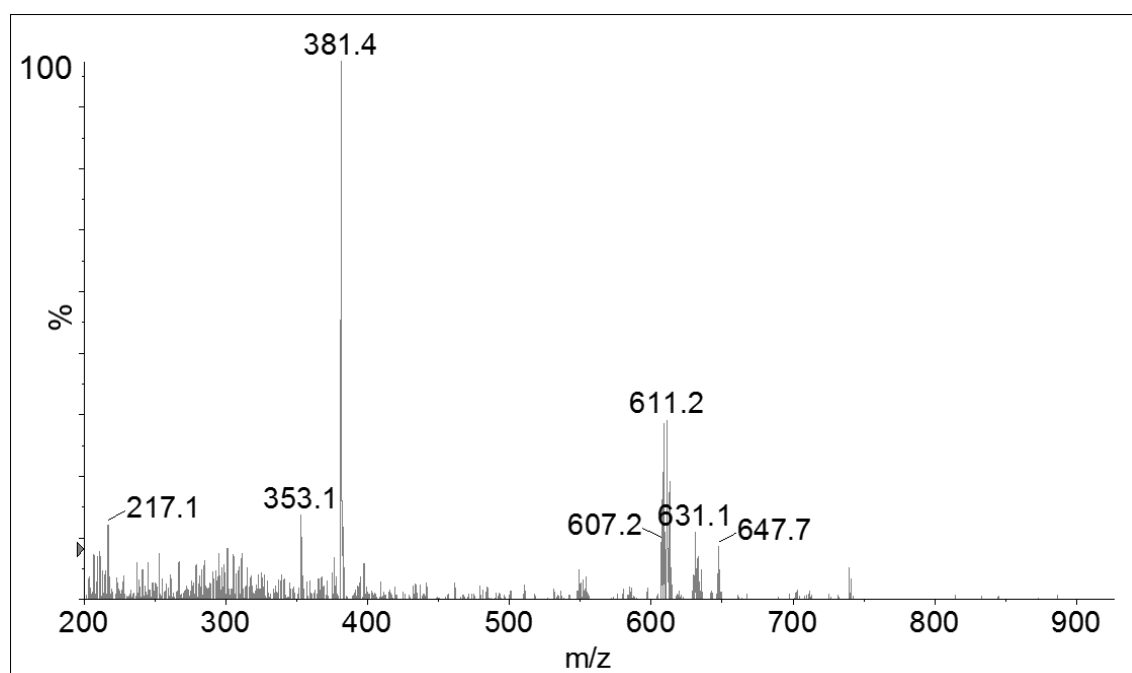

Fig. S50. Mass spectra of compound 3

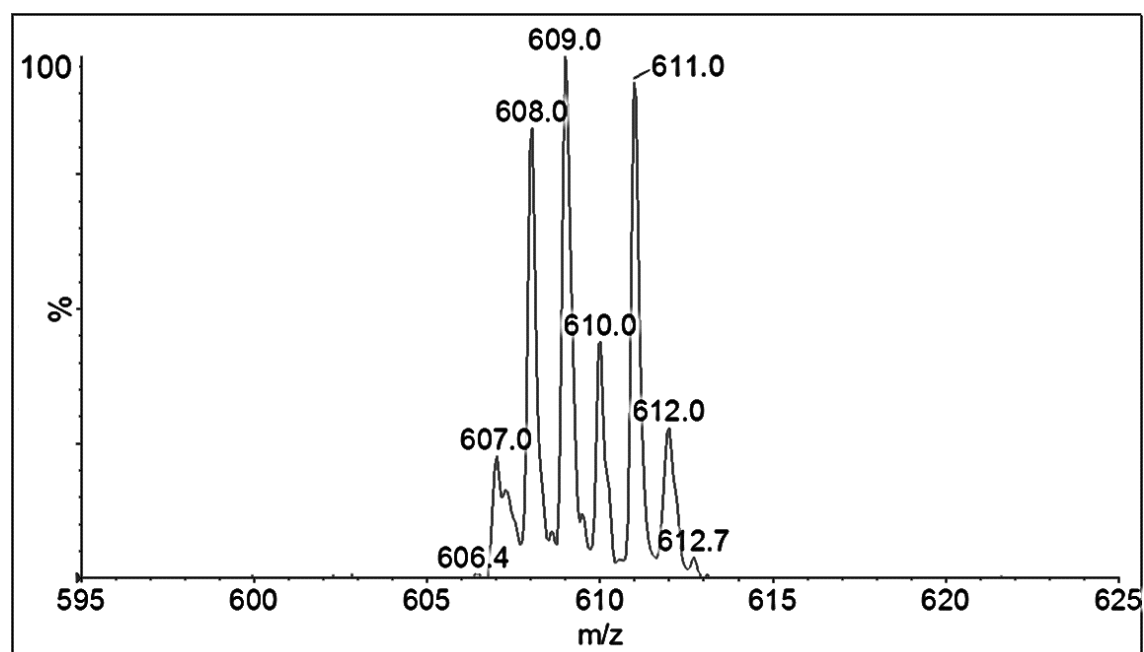

Fig. S51. Enhanced mass resolution spectra of compound 3

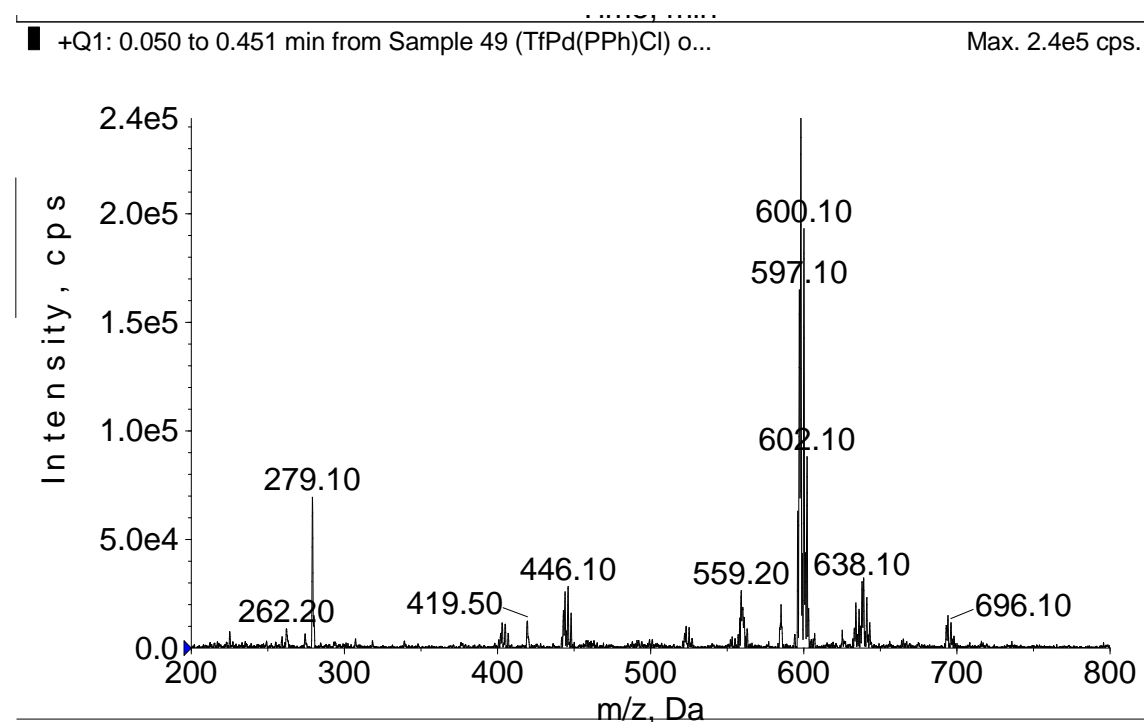

Fig. S52. Mass spectra of compound 4

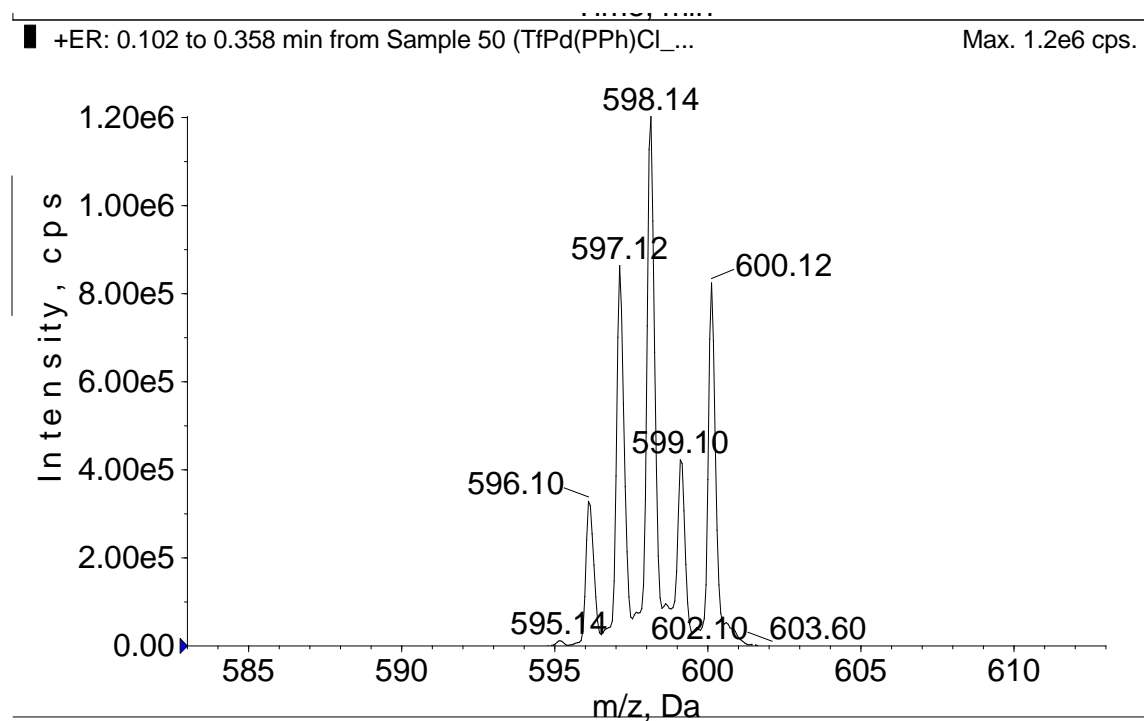

Fig. S53. Enhanced mass resolution spectra of compound 4

## S3. Biological activity data

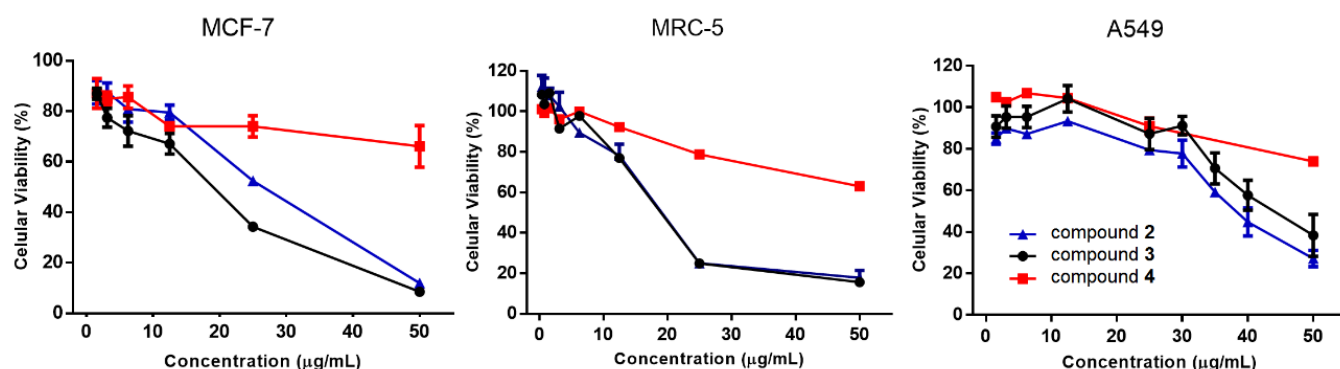

Fig. S54. Cell viability results after compound 2-4 treatment for 48 h.

Table S5. Activity of cathepsin L and B in presence of 2-4 in 10 and 100  $\mu\text{M}$ .

| Enzyme      | Compound | IC <sub>50</sub> ( $\mu\text{M}$ ) | % of residual activity at 10 $\mu\text{M}$ | % of residual activity at 100 $\mu\text{M}$ |
|-------------|----------|------------------------------------|--------------------------------------------|---------------------------------------------|
| Cathepsin B | 2        | <100                               | 75                                         | 31                                          |
|             | 3        | >10                                | 91                                         | Insoluble                                   |
|             | 4        | <10                                | 42                                         | Insoluble                                   |
| Cathepsin L | 2        | <100                               | 78                                         | 47                                          |
|             | 3        | >10                                | 97                                         | Insoluble                                   |
|             | 4        | <100                               | 61                                         | insoluble                                   |

## References

- 1 G. M. Sheldrick, *Acta Cryst A*, 2008, **68**, 112-122.
- 2 G. H. Ribeiro, L. Colina-Vegas, J. C. T. Clavijo, J. Ellena, M. R. Cominetti and A. A. Batista, *Journal of Inorganic Biochemistry*, 2019, **193**, 70-83.
- 3 A. Wolfe, J. H. Shimer, T. Meehan, *Biochemistry*, 1987, **26**, 6392-6396.
- 4 A. I. Matesanz, E. Jimenez-Faraco, M. C. Ruiz, L. M. Balsa, C. Navarro-Ranninger, I. E. León and A. G. Quiroga, *Inorganic Chemistry Frontiers*, 2018, **5**(1), 73-83.
- 5 W. Villarreal, L. Colina-Vegas, G. Visbal, O Corona, R. S. Corrêa, J. Ellena, M. R. Cominetti and A. A. Batista, M. Navarro, *Inorganic Chemistry Frontiers*, 2017, **56**, 3781-3793.
- 6 J. Ruiz, C. Vicente, C. de Haro and D. Bautista, *Inorganic Chemistry*, 2013, **52**(2), 974-982.
